# Supplementary material
Source: PubMed Central journal article supplement (PMC5420350)
Supplement: mmc2.pdf [file mmc2.pdf]

# High-Resolution Genetic Maps Identify Multiple Type 2 Diabetes Loci at Regulatory Hotspots in African Americans and Europeans

Winston Lau,<sup>1</sup> Toby Andrew,<sup>2,3</sup> and Nikolas Maniatis<sup>1,3,\*</sup>

Interpretation of results from genome-wide association studies for T2D is challenging. Only very few loci have been replicated in African ancestry populations and the identification of the implicated functional genes remain largely undefined. We used genetic maps that capture detailed linkage disequilibrium information in European and African Americans and applied these to large T2D case-control samples in order to estimate locations for putative functional variants in both populations. Replicated T2D locations were tested for evidence of being regulatory hotspots using adipose expression. We validated a sample of our co-location intervals using next generation sequencing and functional annotation, including enhancers, transcription, and chromatin modifications. We identified 111 additional disease-susceptibility locations, 93 of which are cosmopolitan and 18 of which are European specific. We show that many previously known signals are also risk loci in African Americans. The majority of the disease locations appear to confer risk of T2D via the regulation of expression levels for a large number (266) of *cis*-regulated genes, the majority of which are not the nearest genes to the disease loci. Sequencing three cosmopolitan locations provided candidate functional variants that precisely co-locate with cell-specific chromatin domains and pancreatic islet enhancers. These variants have large effect sizes and are common across populations. Results show that disease-associated loci in different populations, gene expression, and cell-specific regulatory annotation can be effectively integrated by localizing these effects on high-resolution genetic maps. The *cis*-regulated genes provide insights into the complex molecular pathways involved and can be used as targets for sequencing and functional molecular studies.

## Introduction

No disease with a genetic predisposition has been more intensely investigated than type 2 diabetes (T2D [MIM: 125853]), the world's most widespread and devastating metabolic disorder. Over the last 10 years, numerous consortia have undertaken to characterize the genetic causes of T2D through a very large number (>30) of genome-wide association studies (GWASs) and large-scale meta-analyses. Initially based on Europeans, the focus has now shifted to the replication of risk loci in additional ethnicities (trans-ethnic studies), motivated in part by the likely wider application of cosmopolitan variants for translational research, but also the desire for increasingly larger research sample sizes in order to try to boost study power.<sup>1</sup> But since T2D is really a group of diseases,<sup>2</sup> increased sample size should be met with skepticism unless accompanied by more detailed clinical phenotypes and strategies to minimize disease heterogeneity. Recent trans-ethnic meta-analysis of T2D for four populations (Europeans, East Asians, South Asians, and Mexican Americans) has identified 7 T2D loci,<sup>3</sup> in addition to the previously published list of 69 loci.<sup>4</sup> However, a large proportion of these 76 loci<sup>3</sup> do not show evidence for nominal association for the same “lead” SNP. Since the lead SNP is unlikely to be the causal variant, this low replication rate is a general problem for trans-ethnic studies.<sup>5</sup> The inability to account for genetic distance between neighboring SNPs and genetic

heterogeneity (e.g., locus and allele heterogeneity and variation in LD between populations) are both potential thwarting factors in the endeavor to identify trans-ethnic disease loci.

On the other hand, the prevalence of T2D in African Americans (19%) at approximately twice that of European Americans (10%) and the existence of more genetic diversity in peoples of African ancestry, partly due to less extensive linkage disequilibrium (LD), also gives rise to a major opportunity for comparative fine-mapping studies.<sup>3,6,7</sup> This possibility was missed by a recent major trans-ethnic meta-analyses that unfortunately excluded African-Americans.<sup>3</sup> Here we seek to take advantage of this ancestry group by using a mapping approach to identify cosmopolitan T2D locations, which avoids the focus on lead SNPs. Instead we use high-resolution genetic maps to identify new cosmopolitan T2D susceptibility loci that are shared by both European and African American populations. Genetic distances from these maps accurately capture the genetic architecture of the relevant population and have been successfully used in gene-mapping studies for other common diseases.<sup>8,9</sup> We constructed genetic maps for each of these two populations and then used disease-associated location estimates on these maps as the basis for the precise co-localization and replication in both populations. We also analyzed all 76 previously known T2D loci<sup>3</sup> to obtain refined location estimates on the same genetic maps. Since an estimated 90% of variants with a functional role in

<sup>1</sup>Department of Genetics, Evolution and Environment, University College London, WC1E 6BT London, UK; <sup>2</sup>Department of Genomics of Common Disease, Imperial College London, W12 0NN London, UK

<sup>3</sup>These authors contributed equally to this work

\*Correspondence: [n.maniatis@ucl.ac.uk](mailto:n.maniatis@ucl.ac.uk)

<http://dx.doi.org/10.1016/j.ajhg.2017.04.007>.

© 2017

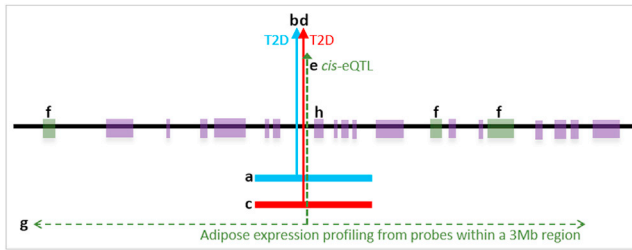

**Figure 1. A Schematic Presentation of the Functional Genomic Study Design**

Shown are the linkage disequilibrium unit (LDU) window of the European (EUR) genetic map (a); location of the causal variant for T2D estimated on the EUR map using a EUR GWAS (b); the corresponding African American (AA) LDU genetic map for the same region (c); location of the causal variant for T2D estimated on the AA map using an AA GWAS (d); location of the *cis*-eQTL (e) for the three associated *cis*-genes (f) that are implicated using adipose expression data (g) for probes from genes within  $\pm 1.5$  Mb distance either side of the T2D locations (b and d). In this example the nearest gene (h) is not the implicated regulated gene.

complex traits such as T2D are likely to be non-coding and regulatory,<sup>10</sup> we assessed this scenario by exploiting publicly available subcutaneous adipose expression data. The hypothesis we tested is that T2D disease loci confer risk of disease by acting as expression quantitative trait loci (eQTL) that regulate the expression of neighboring (*cis*-) genes. To test this hypothesis (Figure 1), we used the same genetic maps to assess whether the location estimates for eQTL also precisely co-located with those mapped for T2D in this whole-genome analysis, thereby identifying potential *cis*-genes and pathways regulated by the disease loci. Finally, we performed fine mapping using targeted next generation sequencing (NGS) of the refined location estimates for one previously known locus (*TCFL72*) and two of the additional cosmopolitan loci from this study using independent case/control sample data, with the aim of identifying the candidate functional variants at the causal location estimates. These examples illustrate a way forward for the systematic identification of putative functional variants at these identified disease-associated eQTLs, coupled with the integration of functional annotation such as cell-specific chromatin domain modifications, enhancers, and transcription binding sites.

## Subjects and Methods

### Study Design

We analyzed two European (EUR) and one African American (AA) sample populations with a total of 5,800 T2D case subjects and 9,691 control subjects. The two independent EUR samples (SNP arrays for GWA and Metabochip) were obtained from the Wellcome Trust Case Control Consortium (WTCCC)<sup>11,12</sup> with a description of diagnostic criteria and sample matching provided in Supplemental Data. The AA GWA sample for a population of predominantly African ancestry was obtained from the National Institute of Diabetes and Digestive and Kidney Diseases (NIDDK).<sup>13</sup> Analyzing “one-SNP-at-a-time” ignores LD structure when testing for association with disease or gene expression.

Here we use population-specific genetic maps, which provide (1) commensurability when making comparisons between different populations and SNP arrays; (2) the means to implement a multi-marker test of association;<sup>14</sup> (3) genetic distances between loci when testing for association with disease or adipose expression; and (4) precise location estimates on the genetic map for potential functional variants, since these estimates are more efficient than using physical maps.<sup>15</sup> We constructed two high-resolution genetic maps based upon HapMap data with genetic distances expressed in linkage disequilibrium units (LDU).<sup>16</sup> The EUR LDU map was used for analyses of the two EUR T2D datasets and the AA LDU map was used for the analysis of the AA T2D dataset. The autosomal genome (sex chromosomes were not included in the analyses) was divided into 4,800 non-overlapping analytical windows, each with a minimum distance of 10 LDU. In addition to windows being the same minimum size on the genetic map, each window also had to include a minimum of 30 SNPs. These criteria yielded an average genetic length of 11 LDU. The identical boundaries in kilobases (kb) for all 4,800 analytical windows were used for the AA dataset, but with longer average genetic length (16 LDU), reflecting a population history of greater antiquity with additional historical recombination events. All SNPs in each analytical window were simultaneously used to test for association with disease using a multi-marker LDU model.<sup>14</sup> The analysis returns one estimated location for a causal variant with the strongest signal, along with the association test *p* value for each window. Utilizing the genetic map in this way, the multi-marker test of association models the degree of regional LD when estimating the location of a putative causal variant on the genetic map. A schematic diagram of the functional genomic strategy used in the current study is provided in Figure 1. Strict criteria were used for the meta-analysis. Location estimates for genome-wide significant meta-analysis loci had to be nominally significant in both ancestry groups for the cosmopolitan loci and in both European samples for the European-specific loci. An interval criterion was used where location estimates from different datasets had to be within  $<100$  kb of one another to qualify as a potential replication. Replicated loci had to pass a Bonferroni corrected meta-analysis *p* value threshold of  $1 \times 10^{-5}$ , based on the total number of genomic tests performed ( $\alpha = 0.05/4,800$ ). We refer to the co-location interval (distance between location estimates) as the genomic region that most plausibly includes the functional variants that confer risk of T2D.

We conducted *in silico* functional gene expression analyses to assess whether the same T2D loci are also eQTL that regulate the expression of neighboring *cis*-genes using data generated by the MuTHER consortium.<sup>17</sup> Summary statistics for the probes and SNPs were available from the MuTHER website. Using adipose tissue mRNA expression probes as quantitative traits, we tested for *cis*-association at each disease locus by employing the same multi-locus LDU model, with potential regulated *cis*-genes defined to be within  $\pm 1.5$  Mb distance either side of each replicated T2D causal location (Figure 1). We considered a disease locus to be a potential eQTL only if the estimated eQTL co-located to within 50 kb of the T2D location and passed Bonferroni correction for the total number of probes tested within  $\pm 1.5$  Mb of each replicated disease locus. All LDU location estimates for both T2D and eQTL on the genetic map were converted back to kb B36 (NCBI36/hg18) for presentation purposes.

Finally, we conducted a NGS targeted re-sequencing experiment for three of the disease loci. Next generation sequencing was

conducted using the Agilent SureSelect<sup>XT2</sup> capture kit following manufacturer protocol guidelines for 100 ng of DNA. Blood DNA samples were sequenced for a total of 94 unrelated European individuals with T2D and 94 unaffected controls 1:1 matched for age, BMI, and sex. Case subjects with a family history of T2D (selection and diagnosis criteria described elsewhere)<sup>18</sup> and control subjects were selected from families originally collected for an obesity (MIM: 601665) study without a history of T2D.<sup>19</sup> Additional method details are provided in the [Supplemental Data](#).

## Results

### Additional Loci for T2D

[Tables 1](#) and [2](#) present the results for the 111 additional loci associated with T2D. Of the 111 loci, 93 provide evidence of being cosmopolitan (signals 1–93, [Table 1](#)), since these loci replicate for both EUR and AA samples, while 18 loci appear to be European specific (94–111, [Table 2](#)), with replication in European samples only. The distances between T2D location estimates for the majority of the 111 loci were narrow (<50 kb apart). Estimation of average pairwise D-prime ( $D'$ ) for all HapMap SNPs found within all the identified 111 disease location intervals (ranging from 0 to <100 kb) is  $D' = 0.86$  in EUR and  $D' = 0.78$  in AA, which reflect the importance of using a genetic map in LDU distances for localization and the <100 kb interval as a criterion for replication. For the majority of the cosmopolitan loci (signals 6–80, [Table 1](#)), the Metachip array was not informative due to the very low SNP coverage in many regions (symbol “–” in [Table 1](#)). Some signals for Metachip passed the minimal number of SNPs (>30 per window) but did not provide significant evidence of association (“NS” in [Table 1](#)) due to the uneven genomic coverage of SNPs on the customized Metachip design.<sup>12</sup> For this reason, there were only 13 cosmopolitan loci (signals 81–93, [Table 1](#)) that provided replicated evidence for AA and Metachip European samples.

For the 111 additional T2D loci, half of the location estimates are intragenic and half are intergenic. For the latter, we follow the convention of labeling the disease loci using the nearest gene symbol (within 100 kb from the T2D location). The in silico expression analyses, however, indicate which *cis*-genes are regulated and therefore functionally implicated by the identified T2D loci. Two-thirds (71/111) of the disease loci also show strong evidence of being eQTLs using our stringent criteria but the remaining one-third may well reflect that these replicated loci could be eQTLs for a T2D-relevant tissue other than subcutaneous adipose. The 71 eQTL signals regulate the expression of a conservatively estimated total of 183 *cis*-genes ([Tables 1](#) and [2](#)), the majority of which are not genes that are the nearest to the disease locus. Indeed, further investigation of the 183 *cis*-genes substantiates quantitatively what has previously been suspected: namely, that the physical kb distance of the eQTL to the *nearest* gene ([Figure 1](#)) is entirely unrelated ( $p > 0.05$ ) to the distance between the same eQTL and the actual (*cis*-associated) *functional* gene

(see [Figure S1](#)). This result demonstrates that the assumption that the nearest gene is also the most likely candidate functional gene is not justified. Further analysis of the 183 *cis*-genes also showed that the distance between the eQTL and the T2D location estimates is not biased by the distance between the T2D sample location estimates within the <100 kb interval (see [Figure S2](#)).

Interestingly, approximately 40% of the eQTL signals observed in this study have at least one *cis*-gene whose expression (in adipose or liver) is also strongly associated with BMI in morbidly obese individuals.<sup>20</sup> We also show that a number of the identified T2D loci also regulate the expression levels of nuclear-encoded mitochondrial genes. For example, many *cis*-genes implicate T2D through the regulation of the molecular functions of fatty acid metabolism (*PCCA* [MIM: 232000], *ACAD11* [MIM: 614288], signals 66 and 99, respectively), glycerophospholipid metabolism (*PISD* [MIM: 612770], *GPAM* [MIM: 602395], signals 80 and 117), pyruvate metabolism (*PDHA2* [MIM: 179061], *HAGH* [MIM: 138760], signals 26/27 and 68), mitochondrial transcription and translation (*MTERFD3* [MIM: 616929], *LACTB* [MIM: 608440], *TRMT11* [MIM: 609752], signals 61, 90, 105), and mitochondrial protein transport (*GFER* [MIM: 600924], signal 68). The *cis*-genes *PDHA2* and *PCCA* (signals 26/27 and 66, respectively) directly implicate the genetic dysregulation of Krebs cycle function as a risk factor for T2D.

To further characterize the observed T2D and associated eQTL location estimates in relation to potential functional variants, three of the cosmopolitan loci were targeted for sequencing using an independent sample of Europeans. [Figure 2](#) presents an example of a regulatory intergenic hotspot near *ACTL7B* (MIM: 604304) on chromosome 9q31.3 (signal 46, [Table 1](#)). The two genetic maps (y axis in LDU) for AA and EUR are plotted against the physical genomic region (x axis in kb), with each data point representing a HapMap SNP from which the genetic LDU maps were inferred ([Figure 2B](#)). Cumulative LDU plots the non-linear relationship between physical distance and the underlying LD, which is typically a “Block-Step” structure. Blocks of LD (SNPs with the same LDU location) represent areas of conserved LD and low haplotype diversity, and steps (increasing LDU distances) define LD breakdown, primarily caused by recombination, since crossover profiles agree precisely with the corresponding LDU steps.<sup>16</sup> The maps show numerous short blocks across the entire region with total LDU length being greater for AA (greater LD breakdown) than the EUR population. The functional location estimates A and E (13 kb apart) indicated by the vertical solid line arrows are associated with T2D in AA and EUR samples, respectively. The dotted lines, in close proximity to the T2D locations (<30 kb), represent the location of eQTLs that regulate the expression of *KLF4* (MIM: 602253) and *EPB41L4B* (MIM: 610340) in subcutaneous adipose (nine genes reside between the two illustrated, but for clarity only the *cis*-genes regulated by the T2D-associated eQTL are plotted). *KLF4* and *EPB41L4B*

**Table 1. Identified Cosmopolitan T2D Susceptibility Loci and Their Regulatory Role of Neighboring Gene Expression**

| Signal | Chr. | Meta p Value           | Distance between Locations <sup>a</sup> | T2D Location GWAS-E <sup>b</sup> | T2D Location GWAS-A <sup>c</sup> | T2D Location metabo-E <sup>d</sup> | Nearest Gene to T2D Locations <sup>e</sup>  | No. of cis-Genes <sup>f</sup> | eQTL-Associated cis-Genes <sup>g</sup> | eQTL Distance from T2D <sup>h</sup> |
|--------|------|------------------------|-----------------------------------------|----------------------------------|----------------------------------|------------------------------------|---------------------------------------------|-------------------------------|----------------------------------------|-------------------------------------|
| 1      | 4p   | $1.73 \times 10^{-56}$ | 1                                       | 44,797                           | 44,857                           | 44,858                             | –                                           | 0                             | –                                      | –                                   |
| 2      | 6q   | $5.28 \times 10^{-10}$ | 4                                       | 72,479                           | 72,509                           | 72,505                             | –                                           | 1                             | FAM135A                                | 1                                   |
| 3      | 13q  | $2.14 \times 10^{-35}$ | 28                                      | 109,848                          | 109,805                          | 109,833                            | COL4A2*                                     | 1                             | ANKRD10                                | 20                                  |
| 4      | 17q  | $2.80 \times 10^{-12}$ | 7                                       | 65,769                           | 65,762                           | 65,769                             | KCNJ2*                                      | 1                             | MAP2K6                                 | 37                                  |
| 5      | 20q  | $1.83 \times 10^{-6}$  | 77                                      | 44,104                           | 44,181                           | 44,104                             | SLC12A5*, CD40* <sup>+</sup>                | 2                             | CD40, CDH22                            | 17                                  |
| 6      | 1p   | $2.48 \times 10^{-6}$  | 41                                      | 82,826                           | 82,867                           | –                                  | –                                           | 1                             | LPHN2*                                 | 8                                   |
| 7      | 1p   | $5.20 \times 10^{-7}$  | 73                                      | 84,451                           | 84,524                           | –                                  | PRKACB* <sup>+</sup> , SAMD13* <sup>+</sup> | 3                             | PRKACB, SAMD13, C1orf52                | 6                                   |
| 8      | 1p   | $1.79 \times 10^{-11}$ | 94                                      | 106,441                          | 106,535                          | –                                  | –                                           | 1                             | PRMT6                                  | 3                                   |
| 9      | 1q   | $5.03 \times 10^{-14}$ | 8                                       | 207,662                          | 207,670                          | –                                  | MIR205HG*                                   | 0                             | –                                      | –                                   |
| 10     | 1q   | $3.40 \times 10^{-9}$  | 3                                       | 232,337                          | 232,340                          | –                                  | SLC35F3*                                    | 0                             | –                                      | –                                   |
| 11     | 1q   | $1.07 \times 10^{-7}$  | 52                                      | 234,896                          | 234,948                          | –                                  | ACTN2*                                      | 3                             | TBCE*, B3GALNT2, ARID4B                | 23                                  |
| 12     | 1q   | $6.33 \times 10^{-7}$  | 49                                      | 243,993                          | 244,042                          | –                                  | SMYD3*                                      | 0                             | –                                      | –                                   |
| 13     | 2p   | $4.57 \times 10^{-7}$  | 95                                      | 12,139                           | 12,044                           | –                                  | MIR3681HG*                                  | 0                             | –                                      | –                                   |
| 14     | 2p   | $2.62 \times 10^{-15}$ | 89                                      | 45,025                           | 44,936                           | –                                  | SIX3*, CAMKMT                               | 3                             | PRKCE*, DYNC2L11, ABCG8                | 27                                  |
| 15     | 2q   | $2.61 \times 10^{-9}$  | 89                                      | 139,530                          | 139,527                          | –                                  | –                                           | 0                             | –                                      | –                                   |
| 16     | 3p   | $4.05 \times 10^{-7}$  | 42                                      | 7,503                            | 7,461                            | –                                  | GRM7*                                       | 1                             | RAD18                                  | 17                                  |
| 17     | 3p   | $1.20 \times 10^{-10}$ | 0                                       | 38,370                           | 38,369                           | NS                                 | XYLB*                                       | 0                             | –                                      | –                                   |
| 18     | 3p   | $5.10 \times 10^{-11}$ | 95                                      | 41,078                           | 41,173                           | NS                                 | CTNNB1                                      | 2                             | CTNNB1*, ZNF621                        | 1                                   |
| 19     | 3p   | $4.22 \times 10^{-23}$ | 13                                      | 47,556                           | 47,569                           | NS                                 | CSPG5                                       | 4                             | IP6K2 (HPK2)*, KIF9, TESSP5, P4HTM     | 3                                   |
| 20     | 3p   | $8.39 \times 10^{-6}$  | 20                                      | 54,986                           | 54,965                           | –                                  | CACNA2D3*                                   | 0                             | –                                      | –                                   |
| 21     | 3p   | $1.13 \times 10^{-13}$ | 59                                      | 67,827                           | 67,768                           | –                                  | SUCLG2                                      | 0                             | –                                      | –                                   |
| 22     | 3p   | $6.67 \times 10^{-10}$ | 9                                       | 87,317                           | 87,327                           | NS                                 | CHMP2B                                      | 0                             | –                                      | –                                   |
| 23     | 3q   | $7.80 \times 10^{-6}$  | 18                                      | 122,056                          | 122,038                          | –                                  | BC032918                                    | 2                             | CD86*, ILDR1                           | 4                                   |
| 24     | 3q   | $5.39 \times 10^{-8}$  | 49                                      | 184,743                          | 184,694                          | –                                  | KLHL6*                                      | 3                             | AP2M1, ABCF3, MAGEF1                   | 0                                   |
| 25     | 4q   | $1.87 \times 10^{-11}$ | 24                                      | 53,132                           | 53,108                           | NS                                 | USP46* <sup>+</sup>                         | 1                             | USP46                                  | 2                                   |
| 26     | 4q   | $2.68 \times 10^{-7}$  | 6                                       | 92,162                           | 92,168                           | –                                  | CCSER1*                                     | 2                             | HSD17B13, PDHA2                        | 0                                   |
| 27     | 4q   | $5.24 \times 10^{-13}$ | 56                                      | 96,319                           | 96,376                           | –                                  | UNC5C*                                      | 1                             | PDHA2                                  | 2                                   |
| 28     | 4q   | $4.02 \times 10^{-13}$ | 3                                       | 102,095                          | 102,098                          | –                                  | PPP3CA                                      | 0                             | –                                      | –                                   |
| 29     | 4q   | $1.50 \times 10^{-6}$  | 74                                      | 148,449                          | 148,375                          | >100 kb                            | –                                           | 1                             | EDNRA                                  | 1                                   |
| 30     | 5q   | $8.84 \times 10^{-6}$  | 44                                      | 52,127                           | 52,083                           | –                                  | PELO*                                       | 1                             | ITGA1                                  | 20                                  |
| 31     | 5q   | $1.56 \times 10^{-8}$  | 14                                      | 59,263                           | 59,277                           | –                                  | PDE4D* <sup>+</sup>                         | 1                             | PDE4D*                                 | 38                                  |
| 32     | 5q   | $2.81 \times 10^{-6}$  | 77                                      | 97,282                           | 97,359                           | –                                  | –                                           | 0                             | –                                      | –                                   |
| 33     | 6p   | $1.00 \times 10^{-7}$  | 86                                      | 40,514                           | 40,429                           | –                                  | LRFN2*, BC132805*                           | 2                             | KCNK5, UNC5CL*                         | 0                                   |
| 34     | 6p   | $1.30 \times 10^{-15}$ | 72                                      | 44,790                           | 44,718                           | –                                  | BX647715                                    | 1                             | PTK7                                   | 4                                   |
| 35     | 6q   | $3.04 \times 10^{-7}$  | 5                                       | 168,842                          | 168,837                          | –                                  | SMOC2                                       | 3                             | MLLT4*, CCR6, C6orf122                 | 1                                   |

(Continued on next page)

Table 1. Continued

| Signal | Chr. | Meta p Value           | Distance between Locations <sup>a</sup> | T2D Location GWAS-E <sup>b</sup> | T2D Location GWAS-A <sup>c</sup> | T2D Location metabo-E <sup>d</sup> | Nearest Gene to T2D Locations <sup>e</sup>               | No. of cis-Genes <sup>f</sup> | eQTL-Associated cis-Genes <sup>g</sup>                                                                             | eQTL Distance from T2D <sup>h</sup> |
|--------|------|------------------------|-----------------------------------------|----------------------------------|----------------------------------|------------------------------------|----------------------------------------------------------|-------------------------------|--------------------------------------------------------------------------------------------------------------------|-------------------------------------|
| 36     | 7p   | $6.93 \times 10^{-8}$  | 85                                      | 24,390                           | 24,305                           | -                                  | <i>NPY</i>                                               | 2                             | <i>CCDC126, OSBPL3</i>                                                                                             | 35                                  |
| 37     | 7p   | $1.49 \times 10^{-8}$  | 4                                       | 35,510                           | 35,514                           | -                                  | <i>HERPUD2</i>                                           | 1                             | <i>AAA1</i>                                                                                                        | 34                                  |
| 38     | 7p   | $5.97 \times 10^{-6}$  | 75                                      | 37,471                           | 37,396                           | -                                  | <i>ELMO1</i> <sup>++</sup>                               | 2                             | <i>ELMO1, GPR141</i>                                                                                               | 30                                  |
| 39     | 7q   | $4.00 \times 10^{-6}$  | 77                                      | 82,225                           | 82,149                           | -                                  | <i>PCLO</i> <sup>*</sup>                                 | 1                             | <i>HGF</i> <sup>*</sup>                                                                                            | 26                                  |
| 40     | 7q   | $4.78 \times 10^{-12}$ | 62                                      | 132,516                          | 132,454                          | -                                  | <i>CHCHD3</i>                                            | 0                             | -                                                                                                                  | -                                   |
| 41     | 7q   | $1.30 \times 10^{-9}$  | 73                                      | 133,716                          | 133,789                          | -                                  | <i>SLC35B4, AKR1B1</i> <sup>*</sup>                      | 0                             | -                                                                                                                  | -                                   |
| 42     | 7q   | $4.44 \times 10^{-10}$ | 14                                      | 134,336                          | 134,322                          | -                                  | <i>AGBL3</i> <sup>*</sup>                                | 1                             | <i>TMEM140</i> <sup>*</sup>                                                                                        | 0                                   |
| 43     | 7q   | $6.98 \times 10^{-14}$ | 75                                      | 141,873                          | 141,798                          | -                                  | <i>TCRBV20S1</i> <sup>*</sup> , <i>TCRB</i> <sup>*</sup> | 4                             | <i>FAM131B</i> <sup>*</sup> , <i>ZYX, OR2A25, OR2F1</i>                                                            | 0                                   |
| 44     | 8p   | $4.81 \times 10^{-8}$  | 93                                      | 14,339                           | 14,246                           | -                                  | <i>SGCZ</i> <sup>*</sup>                                 | 2                             | <i>C8orf79, TUSC3</i>                                                                                              | 11                                  |
| 45     | 8q   | $7.00 \times 10^{-8}$  | 87                                      | 70,416                           | 70,503                           | -                                  | <i>SULF1</i>                                             | 1                             | <i>PRDM14</i>                                                                                                      | 46                                  |
| 46     | 9q   | $6.46 \times 10^{-8}$  | 13                                      | 110,613                          | 110,626                          | NS                                 | <i>ACTL7B</i>                                            | 2                             | <i>EPB41L4B</i> <sup>*</sup> , <i>KLF4</i>                                                                         | 29                                  |
| 47     | 9q   | $8.64 \times 10^{-7}$  | 19                                      | 132,799                          | 132,781                          | -                                  | <i>FIBCD1</i> <sup>*</sup>                               | 4                             | <i>ABL1</i> <sup>*</sup> , <i>AIF1L, RAPGEF1</i> <sup>*</sup> , <i>PRDM12</i>                                      | 23                                  |
| 48     | 10q  | $5.13 \times 10^{-10}$ | 11                                      | 44,467                           | 44,456                           | >100 kb                            | -                                                        | 1                             | <i>ZNF22</i> <sup>*</sup>                                                                                          | 32                                  |
| 49     | 10q  | $1.28 \times 10^{-6}$  | 8                                       | 57,261                           | 57,268                           | -                                  | -                                                        | 1                             | <i>CDC2</i>                                                                                                        | 0                                   |
| 50     | 10q  | $9.29 \times 10^{-9}$  | 0                                       | 65,408                           | 65,408                           | NS                                 | <i>CR622643</i>                                          | 0                             | -                                                                                                                  | -                                   |
| 51     | 10q  | $8.37 \times 10^{-11}$ | 66                                      | 77,817                           | 77,883                           | -                                  | <i>C10orf11</i> <sup>++</sup>                            | 2                             | <i>C10orf11, DUPD1</i>                                                                                             | 1                                   |
| 52     | 11p  | $4.29 \times 10^{-9}$  | 5                                       | 22,257                           | 22,262                           | -                                  | <i>ANOS</i> <sup>*</sup>                                 | 0                             | -                                                                                                                  | -                                   |
| 53     | 11p  | $5.53 \times 10^{-13}$ | 88                                      | 32,453                           | 32,364                           | -                                  | <i>WT1</i> <sup>++</sup>                                 | 4                             | <i>PRRG4</i> <sup>*</sup> , <i>FBXO3</i> <sup>*</sup> , <i>ELP4, WT1</i>                                           | 14                                  |
| 54     | 11q  | $4.12 \times 10^{-8}$  | 0                                       | 57,558                           | 57,558                           | NS                                 | <i>OR9Q1</i> <sup>*</sup>                                | 1                             | <i>MPEG1</i>                                                                                                       | 33                                  |
| 55     | 11q  | $1.11 \times 10^{-9}$  | 21                                      | 59,295                           | 59,315                           | -                                  | <i>STX3</i> <sup>*</sup>                                 | 0                             | -                                                                                                                  | -                                   |
| 56     | 12p  | $1.40 \times 10^{-7}$  | 31                                      | 25,404                           | 25,373                           | -                                  | <i>KRAS</i>                                              | 1                             | <i>SSPN</i>                                                                                                        | 0                                   |
| 57     | 12p  | $8.75 \times 10^{-7}$  | 6                                       | 29,568                           | 29,574                           | -                                  | <i>TMTC1</i> <sup>*</sup>                                | 0                             | -                                                                                                                  | -                                   |
| 58     | 12q  | $3.45 \times 10^{-6}$  | 91                                      | 57,035                           | 57,127                           | NS                                 | -                                                        | 2                             | <i>SLC26A10, MBD6</i>                                                                                              | 1                                   |
| 59     | 12q  | $8.78 \times 10^{-6}$  | 34                                      | 61,602                           | 61,636                           | -                                  | <i>PPM1H</i> <sup>*</sup>                                | 0                             | -                                                                                                                  | -                                   |
| 60     | 12q  | $2.45 \times 10^{-6}$  | 62                                      | 98,425                           | 98,363                           | -                                  | <i>ANKS1B</i> <sup>*</sup>                               | 0                             | -                                                                                                                  | -                                   |
| 61     | 12q  | $1.45 \times 10^{-6}$  | 22                                      | 104,931                          | 104,909                          | -                                  | <i>NUAK1</i>                                             | 1                             | <i>MTERFD3</i>                                                                                                     | 0                                   |
| 62     | 13q  | $2.09 \times 10^{-7}$  | 85                                      | 26,479                           | 26,564                           | -                                  | <i>USP12</i> <sup>*</sup>                                | 0                             | -                                                                                                                  | -                                   |
| 63     | 13q  | $8.19 \times 10^{-6}$  | 40                                      | 47,133                           | 47,173                           | -                                  | -                                                        | 0                             | -                                                                                                                  | -                                   |
| 64     | 13q  | $7.16 \times 10^{-14}$ | 13                                      | 65,393                           | 65,380                           | -                                  | <i>MIR548X2</i>                                          | 0                             | -                                                                                                                  | -                                   |
| 65     | 13q  | $1.10 \times 10^{-14}$ | 82                                      | 66,885                           | 66,803                           | -                                  | -                                                        | 0                             | -                                                                                                                  | -                                   |
| 66     | 13q  | $5.74 \times 10^{-7}$  | 44                                      | 101,207                          | 101,251                          | -                                  | <i>FGF14</i> <sup>++</sup>                               | 3                             | <i>TMTC4, PCCA, FGF14</i>                                                                                          | 0                                   |
| 67     | 15q  | $1.13 \times 10^{-6}$  | 16                                      | 45,938                           | 45,954                           | -                                  | <i>LINC01494</i>                                         | 0                             | -                                                                                                                  | -                                   |
| 68     | 16p  | $2.90 \times 10^{-10}$ | 80                                      | 1,700                            | 1,781                            | -                                  | <i>MAPK8IP3, IGFALS</i>                                  | 7                             | <i>HAGH</i> <sup>*</sup> , <i>PGP</i> <sup>*</sup> , <i>TPSAB1</i> <sup>*</sup> , <i>FAHD1, GFER, GNPTG, PRR25</i> | 0                                   |
| 69     | 16p  | $2.24 \times 10^{-6}$  | 32                                      | 12,605                           | 12,636                           | -                                  | <i>SNX29</i>                                             | 3                             | <i>CLEC16A</i> <sup>*</sup> , <i>SOCS1, LITAF</i>                                                                  | 10                                  |
| 70     | 16q  | $1.75 \times 10^{-26}$ | 4                                       | 70,999                           | 70,995                           | >100 kb                            | <i>AK055364</i>                                          | 1                             | <i>HYDIN</i>                                                                                                       | 2                                   |

(Continued on next page)

**Table 1. Continued**

| Signal | Chr. | Meta p Value           | Distance between Locations <sup>a</sup> | T2D Location GWAS-E <sup>b</sup> | T2D Location GWAS-A <sup>c</sup> | T2D Location metabo-E <sup>d</sup> | Nearest Gene to T2D Locations <sup>e</sup> | No. of cis-Genes <sup>f</sup> | eQTL-Associated cis-Genes <sup>g</sup>                           | eQTL Distance from T2D <sup>h</sup> |
|--------|------|------------------------|-----------------------------------------|----------------------------------|----------------------------------|------------------------------------|--------------------------------------------|-------------------------------|------------------------------------------------------------------|-------------------------------------|
| 71     | 16q  | $1.03 \times 10^{-11}$ | 20                                      | 77,036                           | 77,016                           | –                                  | WVOX*                                      | 0                             | –                                                                | –                                   |
| 72     | 16q  | $5.52 \times 10^{-19}$ | 29                                      | 78,435                           | 78,406                           | –                                  | LOC101928248                               | 2                             | MAF*, WVOX                                                       | 11                                  |
| 73     | 17q  | $4.15 \times 10^{-7}$  | 47                                      | 34,640                           | 34,593                           | >100 kb                            | STAC2, CACNB1*                             | 4                             | PLXDC1, CRKRS, ZBP2, KRT222                                      | 6                                   |
| 74     | 18q  | $9.58 \times 10^{-10}$ | 0                                       | 36,270                           | 36,271                           | –                                  | –                                          | 0                             | –                                                                | –                                   |
| 75     | 18q  | $6.84 \times 10^{-6}$  | 72                                      | 74,880                           | 74,809                           | –                                  | SALL3                                      | 0                             | –                                                                | –                                   |
| 76     | 21q  | $3.09 \times 10^{-9}$  | 30                                      | 20,521                           | 20,490                           | –                                  | DYRK1A                                     | 0                             | –                                                                | –                                   |
| 77     | 21q  | $9.56 \times 10^{-8}$  | 61                                      | 27,738                           | 27,677                           | –                                  | MIR5009                                    | 0                             | –                                                                | –                                   |
| 78     | 21q  | $1.35 \times 10^{-10}$ | 39                                      | 34,148                           | 34,109                           | –                                  | ITSN*                                      | 2                             | C21orf66, TCP10L                                                 | 0                                   |
| 79     | 21q  | $1.53 \times 10^{-6}$  | 1                                       | 37,635                           | 37,633                           | –                                  | DYRK1A                                     | 1                             | KCNJ6                                                            | 0                                   |
| 80     | 22q  | $7.29 \times 10^{-9}$  | 0                                       | 31,376                           | 31,376                           | –                                  | SYN3*                                      | 1                             | PISD                                                             | 12                                  |
| 81     | 2p   | $6.46 \times 10^{-6}$  | 7                                       | NS                               | 21,294                           | 21,301                             | –                                          | 1                             | SDC1                                                             | 33                                  |
| 82     | 2p   | $5.02 \times 10^{-9}$  | 0                                       | >100 kb                          | 26,774                           | 26,774                             | KCNK3                                      | 6                             | OTOF*, GAREM2, CCDC121, ASXL2, DNMT3A, CENPA                     | 3                                   |
| 83     | 2q   | $1.02 \times 10^{-11}$ | 1                                       | >100 kb                          | 135,313                          | 135,313                            | ACMSD*                                     | 0                             | –                                                                | –                                   |
| 84     | 2q   | $2.25 \times 10^{-11}$ | 0                                       | NS                               | 203,732                          | 203,732                            | NBEAL1                                     | 0                             | –                                                                | –                                   |
| 85     | 4q   | $2.77 \times 10^{-9}$  | 8                                       | >100 kb                          | 103,404                          | 103,395                            | SLC39A8* <sup>+</sup>                      | 1                             | SLC39A8                                                          | 0                                   |
| 86     | 6p   | $2.09 \times 10^{-13}$ | 60                                      | NS                               | 28,525                           | 28,586                             | ZSCAN23, PX6                               | 8                             | ZKSCAN3, PGBD1*, MAS1L, OR2W1, OR11A1, HLA-F, IFITM4P, ZNF184    | 6                                   |
| 87     | 8p   | $1.54 \times 10^{-18}$ | 44                                      | >100 kb                          | 18,194                           | 18,238                             | NAT1, NAT2                                 | 3                             | PDGFRL*, CSGALNACT1, PCMI                                        | 1                                   |
| 88     | 11p  | $1.86 \times 10^{-20}$ | 86                                      | >100 kb                          | 8,508                            | 8,594                              | STK33*, TRIM66*                            | 0                             | –                                                                | –                                   |
| 89     | 12q  | $4.10 \times 10^{-16}$ | 44                                      | >100 kb                          | 48,574                           | 48,618                             | FAIM2* <sup>+</sup>                        | 1                             | FAIM2                                                            | 10                                  |
| 90     | 15q  | $1.93 \times 10^{-7}$  | 77                                      | NS                               | 61,133                           | 61,210                             | TPM1* <sup>+</sup> , LACTB* <sup>+</sup>   | 9                             | TPM1, RPS27L*, DAPK2*, SNX1, LACTB, APH1B, HERC1, FAM96A, VPS13C | 1                                   |
| 91     | 17q  | $2.02 \times 10^{-6}$  | 86                                      | >100 kb                          | 44,633                           | 44,548                             | GNGT2* <sup>+</sup> , B4GALNT2             | 3                             | GNGT2, SAMD14*, HOXB3*                                           | 19                                  |
| 92     | 17q  | $3.95 \times 10^{-8}$  | 85                                      | >100 kb                          | 60,951                           | 60,866                             | AXIN2* <sup>+</sup>                        | 1                             | AXIN2                                                            | 38                                  |
| 93     | 20p  | $1.90 \times 10^{-19}$ | 31                                      | >100 kb                          | 25,718                           | 25,687                             | FAM182B*                                   | 0                             | –                                                                | –                                   |

<sup>a</sup>T2D-associated intervals in kb (<100) that harbor T2D susceptibility loci in both populations; the minimum distance is provided for signals 1–5

<sup>b</sup>Location estimates for the European (E) GWASS

<sup>c</sup>Location estimates for the African American (A) GWASS

<sup>d</sup>Location estimates for the Metaboshop European (E) samples; signals with low SNP coverage (indicated by “–”) were not meta-analyzed

<sup>e</sup>Genes with asterisk (\*) denote the intragenic localization and genes with plus sign (+) indicate self-regulatory

<sup>f</sup>Number of cis-genes regulated by the eQTL

<sup>g</sup>List of cis-genes associated with eQTLs that co-located within <50 kb of the T2D locations; cis-genes with asterisk (\*) have previously shown evidence of association between body mass index in morbidly obese and adipose/liver expression profiles<sup>20</sup>

<sup>h</sup>Distance in kb (<50) between eQTL and T2D locations; the minimum is given when more than one cis-gene is implicated

are 1.3 Mb downstream and 350 kb upstream, respectively. Targeted next-generation re-sequencing of the 39 kb region centered on these A and E locations shows evidence of association between T2D and variants, which coincide with the estimates for the T2D-associated eQTL (summary

statistics of the NGS SNPs are provided in Figure 2A). Although only nominally significant ( $p < 0.05$ ) due to small sample size (94 case subjects and 94 control subjects), these common variants both confirm the expected location estimate and account for a relatively large risk of

**Table 2. Identified European-Specific T2D Susceptibility Loci and Their Regulatory Role of Neighboring Gene Expression**

| Signal | Chr. | Meta p Value           | Distance of T2D Locations <sup>a</sup> | T2D Location GWAS-E <sup>b</sup> | T2D Location GWAS-A <sup>c</sup> | T2D Location metabo-E <sup>d</sup> | Nearest Gene to T2D Locations <sup>e</sup> | No. of cis-Genes <sup>f</sup> | eQTL Associated cis-Genes <sup>g</sup>                                                                            | eQTL Distance from T2D <sup>h</sup> |
|--------|------|------------------------|----------------------------------------|----------------------------------|----------------------------------|------------------------------------|--------------------------------------------|-------------------------------|-------------------------------------------------------------------------------------------------------------------|-------------------------------------|
| 94     | 1p   | $2.02 \times 10^{-7}$  | 3                                      | 25,879                           | NS                               | 25,876                             | <i>MAN1C1</i> *                            | 2                             | <i>DHDDS, C1orf172</i>                                                                                            | 0                                   |
| 95     | 1q   | $6.94 \times 10^{-12}$ | 21                                     | 228,322                          | NS                               | 228,344                            | <i>GALNT2</i> *                            | 0                             | –                                                                                                                 | –                                   |
| 96     | 2p   | $4.11 \times 10^{-34}$ | 34                                     | 605                              | NS                               | 639                                | <i>TMEM18</i>                              | 0                             | –                                                                                                                 | –                                   |
| 97     | 2p   | $1.18 \times 10^{-7}$  | 46                                     | 40,320                           | >100 kb                          | 40,274                             | <i>SLC8A1-AS1</i> *                        | 4                             | <i>THUMP2, TMEM178, MORN2, DHXS7</i>                                                                              | 0                                   |
| 98     | 3p   | $1.03 \times 10^{-9}$  | 5                                      | 53,518                           | NS                               | 53,513                             | <i>CACNA1D</i> *                           | 0                             | –                                                                                                                 | –                                   |
| 99     | 3q   | $9.35 \times 10^{-7}$  | 7                                      | 133,919                          | NS                               | 133,912                            | <i>ACAD11</i> * <sup>+</sup>               | 8                             | <i>ACAD11, SLC02A1, RYK, NPHP3, ACKR4, SRPRB, CDV3, RAB6B</i>                                                     | 0                                   |
| 100    | 4q   | $1.86 \times 10^{-22}$ | 66                                     | 104,224                          | >100 kb                          | 104,157                            | <i>BDH2, NHEDC1</i>                        | 0                             | –                                                                                                                 | –                                   |
| 101    | 5q   | $2.62 \times 10^{-9}$  | 12                                     | 76,449                           | NS                               | 76,461                             | <i>ZBED3</i>                               | 1                             | <i>PDE8B</i> *                                                                                                    | 15                                  |
| 102    | 6p   | $2.64 \times 10^{-24}$ | 13                                     | 29,662                           | NS                               | 29,674                             | <i>GABBR1</i>                              | 7                             | <i>GNL1*, TRIM10, TRIM27, DDRI, TRIM40, TRIM15, OR10C1</i>                                                        | 9                                   |
| 103    | 6p   | $1.46 \times 10^{-28}$ | 6                                      | 31,709                           | >100 kb                          | 31,704                             | <i>BAT2, AIF1</i>                          | 14                            | <i>AIF1*, TRIM39*, AGER, BAT4, CCHCR1, DOM3Z, EHMT2, HLA-DMB, HLA-DPA1, HSPA1B, LST1, TRIM10, NOTCH4, HLA-DRA</i> | 0                                   |
| 104    | 6q   | $6.29 \times 10^{-56}$ | 0                                      | 118,801                          | >100 kb                          | 118,801                            | <i>SLC35F1</i>                             | 0                             | –                                                                                                                 | –                                   |
| 105    | 6q   | $4.23 \times 10^{-17}$ | 37                                     | 127,581                          | NS                               | 127,544                            | <i>RSPO3</i> * <sup>+</sup>                | 2                             | <i>RSPO3, TRMT11</i>                                                                                              | 1                                   |
| 106    | 10q  | $3.39 \times 10^{-24}$ | 40                                     | 104,790                          | >100 kb                          | 104,830                            | <i>CNNM2</i> *                             | 0                             | –                                                                                                                 | –                                   |
| 107    | 11p  | $2.50 \times 10^{-6}$  | 1                                      | 43,836                           | NS                               | 43,836                             | <i>HSD17B12</i>                            | 1                             | <i>HSD17B12</i>                                                                                                   | 1                                   |
| 108    | 11q  | $6.39 \times 10^{-6}$  | 21                                     | 65,337                           | >100 kb                          | 65,357                             | <i>OVOLI, SNX32</i> * <sup>+</sup>         | 4                             | <i>SNX32, MAJIN*, SNX15, EFEMP2</i>                                                                               | 9                                   |
| 109    | 12q  | $6.16 \times 10^{-6}$  | 4                                      | 54,905                           | >100 kb                          | 54,909                             | <i>OBFC2B</i> * <sup>+</sup>               | 4                             | <i>OBFC2B, RGL1*, RPS26, STAT2</i>                                                                                | 0                                   |
| 110    | 12q  | $4.66 \times 10^{-8}$  | 3                                      | 111,476                          | >100 kb                          | 111,473                            | <i>PTPN11</i>                              | 4                             | <i>ERP29, TMEM116, MAPKAPK5, NAPI</i>                                                                             | 20                                  |
| 111    | 17q  | $3.05 \times 10^{-9}$  | 51                                     | 25,003                           | >100 kb                          | 25,054                             | <i>SSH2</i> *                              | 1                             | <i>CORO6</i>                                                                                                      | 9                                   |

<sup>a</sup>T2D associated intervals in kb (<100) that harbor T2D susceptibility loci in two European populations

<sup>b</sup>T2D location estimates for the European (E) GWAS

<sup>c</sup>The African American (A) GWAS yielded either significant but distant locations from the European T2D location (>100 kb) or not significant (NS) estimates

<sup>d</sup>Location estimates for the Metabochip European (E) samples that were within <100 kb of the GWAS-E location

<sup>e</sup>Genes with asterisk (\*) denote the intragenic localization and genes with plus sign (+) indicate self-regulatory genes

<sup>f</sup>Number of cis-genes regulated by the eQTLs

<sup>g</sup>List of cis-genes associated with eQTLs that co-located within <50 kb of the T2D locus, cis-genes with asterisk (\*) have previously shown evidence of association between body mass index for morbidly obese and adipose/liver expression profiles<sup>20</sup>

<sup>h</sup>Distance in kb (<50) between eQTL and T2D locations, the minimum is given when more than one cis-gene is implicated

disease (odds ratio [OR] of 2.0–2.4), with the risk allele frequencies (RAF) being similar in a number of human populations from the 1000 Genomes Project. Examination of the epigenetic chromatin marks from trimethylation of histone H3 at lysine 4 (H3K4me3) and acetylation of histone H3 at lysine 27 (H3K27ac), which highlight regulatory elements such as active promoters and enhancers,<sup>21</sup> has previously been shown to overlap with T2D loci,<sup>22</sup> but such marks are often cell type specific.<sup>23</sup> Figure 2C plots the  $-\log_{10}$  p values of the chromatin profiles,

demonstrating that T2D causal locations also co-localize with chromatin domains for CD14<sup>+</sup> monocytes and adipose nuclei. The most intense chromatin peaks were observed in CD14<sup>+</sup> monocytes at the precise eQTL location for *KLF4* and at rs60388922 and rs72756001 SNPs, which reside within the E and A T2D interval. Hence both of these SNPs are good causal candidate variants.

Figure 3 presents the regulatory potassium channel, subfamily k, member 3 (*KCNK3* [MIM: 603220]) locus (signal 82, Table 1) on chromosome 2p23.3 with identical

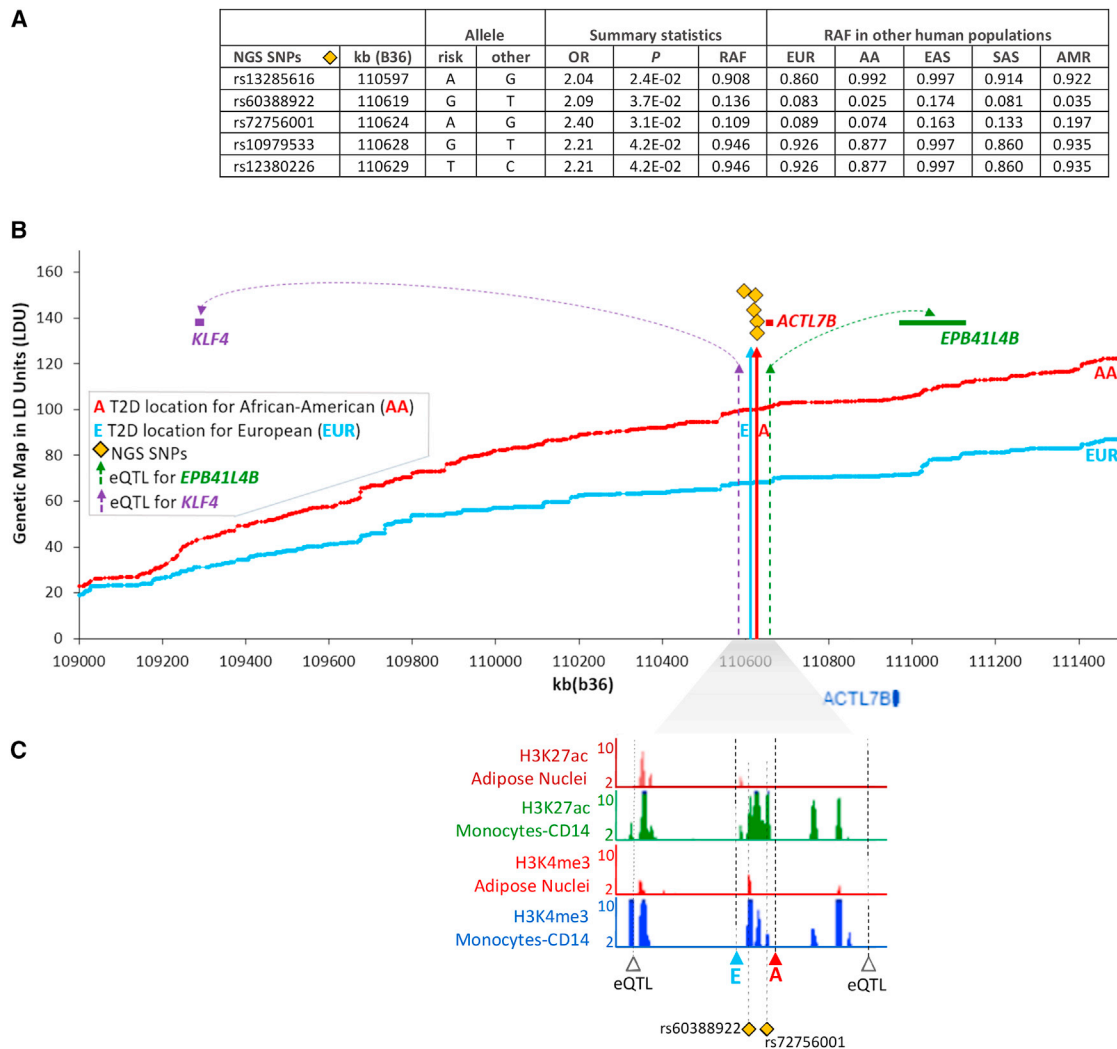

**Figure 2. Candidate Causal Variants at T2D Locations in the *ACTL7B* Region and Their Regulatory Role**

(A) Identified T2D-associated SNPs using targeted next generation sequencing (NGS) of the functional location estimates on the LDU genetic maps and their risk allele frequency (RAF) in Europeans (EUR), African Americans (AA), East Asian (EAS), South Asian (SAS), and Mexican Americans (AMR).

(B) The two LDU genetic maps (y axis in LDU) for AA and EUR are plotted against the physical genomic region (x axis in kb). Vertical solid arrows represent the functional location estimates A and E that are associated with T2D in AA and EUR samples, respectively. The dotted line arrows are the locations of eQTLs.

(C)  $-\log_{10}$  p values of cell type-specific chromatin profiles are plotted against the kb map. T2D, eQTL, and NGS SNP locations overlap with the co-ordinates of the chromatin peaks.

location estimates for both AA and EUR samples (Figure 3B). Despite the disease locus residing within *KCNK3*, expression analyses indicate that this locus may not be functionally related to this gene, but instead is a *cis*-eQTL that regulates the distant genes *DNMT3A* (MIM: 602769), *ASXL2* (MIM: 612991), *GAREM2*, *OTOF* (MIM: 603681), *CENPA* (MIM: 117139), and *CCDC121*, with *DNMT3A* and *CCDC121* being 1.5 Mb and 896 kb away from the eQTL, respectively. This is a gene-rich region (57 genes in total), but for clarity only the six identified *cis*-genes have been plotted. Figure 3A presents summary statistics for the variants associated with T2D for a 42 kb targeted re-sequence region. These associated variants (p value < 0.05) coincide with the promoter region of *KCNK3*, 11 kb

upstream of the T2D location estimate and account for a high risk of disease (OR = 3.5–4.8). The RAF are approximately 0.05 and the results show that these variants are indeed cosmopolitan, since they are common not only in EUR and AA but also in other human populations (e.g., East and South Asians and Mexican Americans). Using information from the human pancreatic islet regulome,<sup>22</sup> where sequences targeted by islet transcription factors highlight active enhancers, we observed that the identified T2D location resides within a cluster of such active enhancers. The transcription factor FOXA2-bound sites are also plotted within the kb boundaries of the active enhancer cluster. Chromatin peaks also overlap with the regulatory T2D and eQTL locations for pancreas and liver



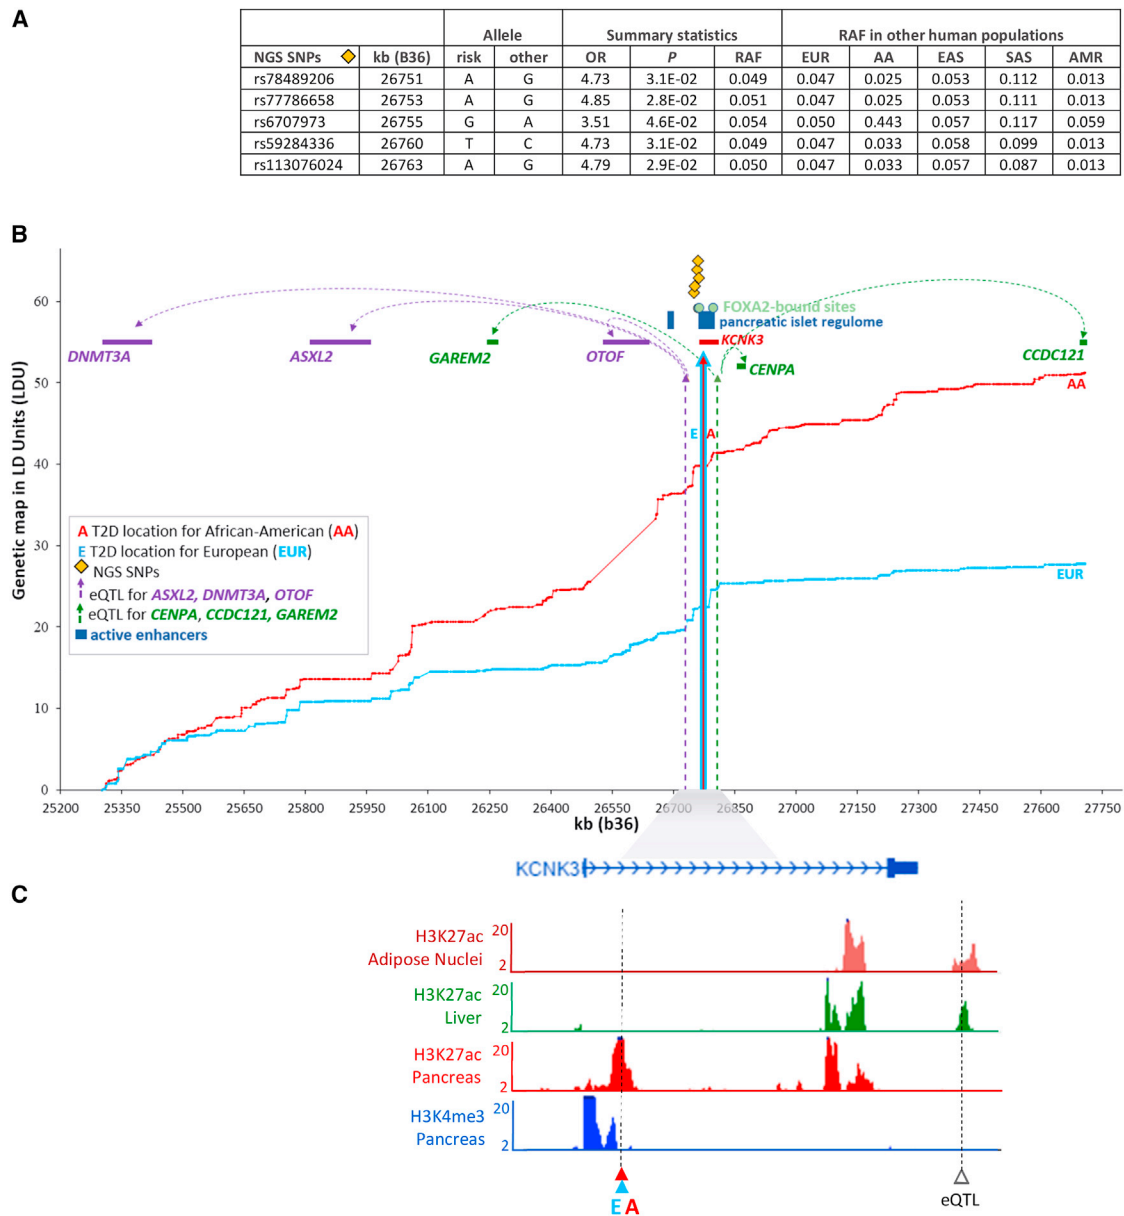

**Figure 3. Candidate Causal Variants at T2D Locations in the *KCNK3* Region and Their Regulatory Role**

(A) Identified T2D-associated SNPs using targeted next generation sequencing (NGS) of the functional location estimates on the LDU genetic maps and their risk allele frequency (RAF) in Europeans (EUR), African Americans (AA), East Asian (EAS), South Asian (SAS), and Mexican Americans (AMR).

(B) The two LDU genetic maps (y axis in LDU) for AA and EUR are plotted against the physical genomic region (x axis in kb). Vertical solid arrows represent the functional location estimates A and E that are associated with T2D in AA and EUR samples, respectively. The dotted arrows are the locations of eQTLs.

(C)  $-\log_{10}$  p values of cell type-specific chromatin profiles are plotted against the kb map. T2D and eQTL locations overlap with the coordinates of the chromatin peaks.

cell types (Figure 3C), suggesting evidence for more than one functional mutation within this region. The full interval for the T2D and eQTL locations were not entirely covered by NGS data, but nevertheless, the associated NGS SNPs reside between two active islet enhancers (Figure 3B). In contrast to imputation methods that use high-resolution “out-of-sample” marker panels to infer missing SNPs to subsequently test one at a time, LDU analysis uses marker panels to infer high-resolution genetic

maps. Subsequently, multi-marker tests of association use genetic distances for SNP arrays placed on those maps to infer the location of disease-associated functional variants. Fine mapping is therefore achieved by inferring fine-scale genetic maps, not by imputing SNPs. It is worth noting in relation to this that using the *KCNK3* locus as an example, the NGS SNPs genotyped for the case control data that were associated with T2D status (Figure 3A) could not be imputed based on the 1000G data as the reference panel.

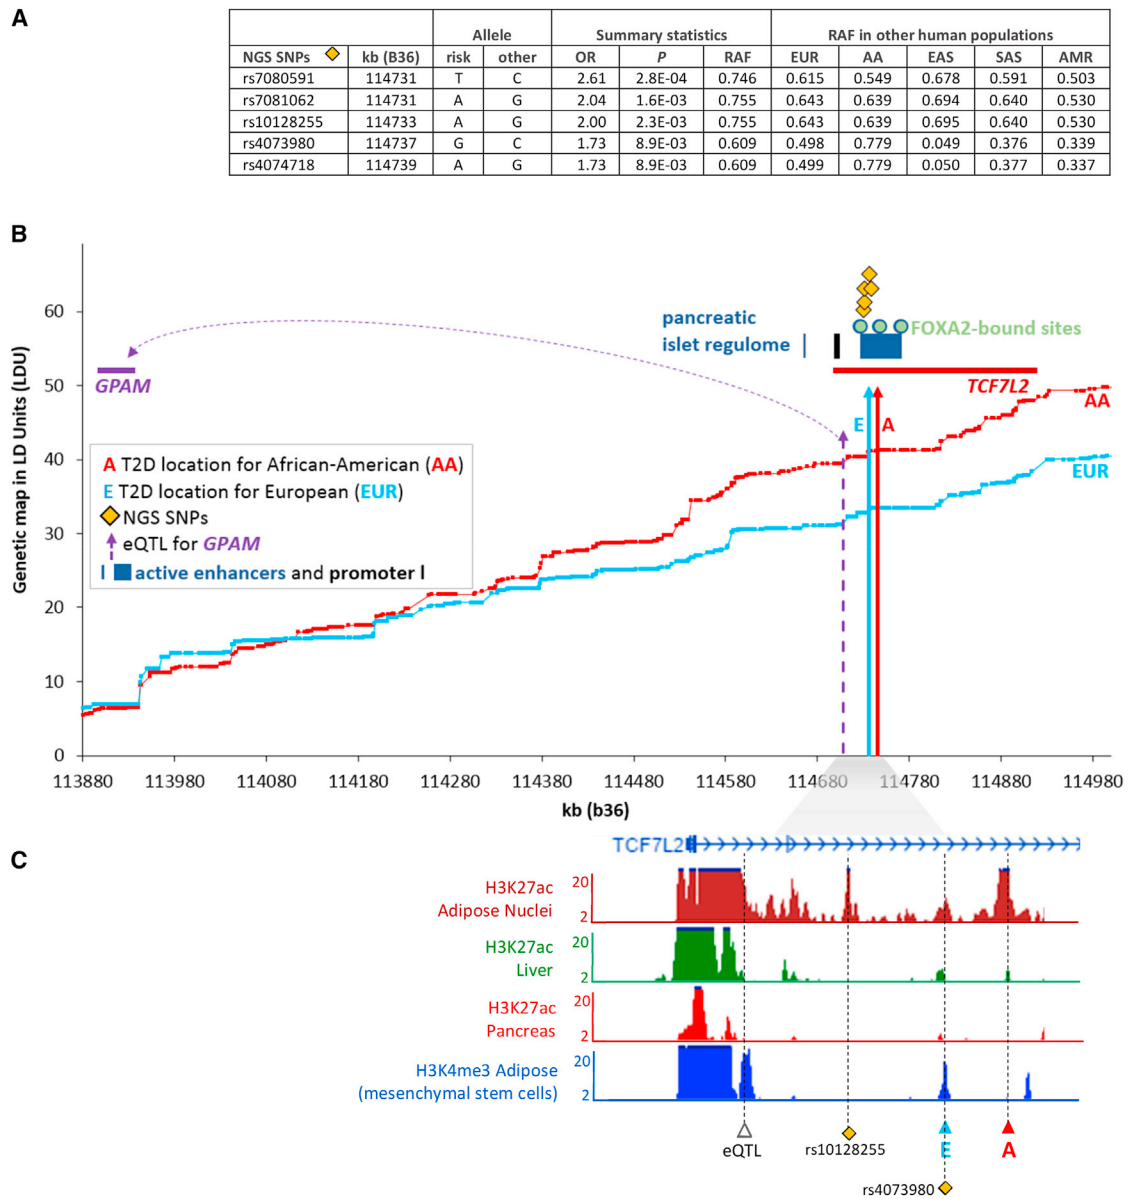

**Figure 4. Candidate Causal Variants at T2D Locations in the *TCF7L2* Region and Their Regulatory Role**

(A) Identified T2D-associated SNPs using targeted next generation sequencing (NGS) of the functional location estimates on the LDU genetic maps and their risk allele frequency (RAF) in Europeans (EUR), African Americans (AA), East Asian (EAS), South Asian (SAS), and Mexican Americans (AMR).

(B) The two LDU genetic maps (y axis in LDU) for AA and EUR are plotted against the physical genomic region (x axis in kb). Vertical solid arrows represent the functional location estimates A and E that are associated with T2D in AA and EUR samples, respectively. The dotted arrow is the location of eQTL.

(C)  $-\log_{10}$  p values of cell type-specific chromatin profiles are plotted against the kb map. T2D, eQTL, and NGS SNP locations overlap with the co-ordinates of the chromatin peaks.

### Findings at Previously Known T2D Loci

Using the same data and analytical methods, we have confirmed disease location estimates for 62 out of 76 previously known loci<sup>3</sup> (Table S1). Of these, about half (33/62) show evidence of being eQTL with the majority regulating *cis*-genes more than 1 Mb away. In addition, more than one-third (22/62) of the loci replicate for AA samples, which were previously excluded from trans-ethnic meta-analysis.<sup>3</sup> We investigated the Transcription factor 7-like 2 (*TCF7L2* [MIM: 602228]) locus (signal 117, Table S1).

Figure 4B plots the T2D locations for EUR and AA and shows that this signal harbors a *cis*-eQTL for the distant *GPAM*. The T2D re-sequencing variants we identified, which co-locate to the <30 kb interval between the T2D and eQTL locations, account for a large risk of disease (OR = 1.7–2.6). The summary statistics in Figure 4A show that these risk variants are the major allele in all other human populations. The T2D locations for both populations reside within an active enhancer cluster that is targeted by transcription factor FOXA2 (kb locations of the

regulatory elements are plotted on the x axis). Inferring the likely transcriptional activity by observing the chromatin state, we show that the eQTL, T2D co-locations, and NGS SNPs all map precisely to highly significant H3K4me3 and H3K27ac peaks, in particular in adipose cells (Figure 4C). This illustrates the importance of co-locating within an interval on the genetic map, since it allows for potential allelic heterogeneity.

## Discussion

This study provides a comprehensive genomic catalog of susceptibility loci for T2D in European and African ancestry populations and evidence that the majority of the additional 111 and 62 previously known disease loci are eQTLs for 183 and 83 *cis*-genes, respectively. This implies that these disease loci confer risk of T2D via the *cis*-regulation of the expression levels in tissue relevant to T2D for a large number (266 in total) of neighboring genes. This study identifies a large number of disease loci at regulatory hotspots and replicates them in both European and African American populations, with 84% (93/111) of the additional loci being cosmopolitan. This replication was made possible by analyses that make use of, rather than being confounded by, the fine-scale differences in LD between these two populations, where causal locations and also eQTLs are estimated on an LDU map, avoiding the ambivalence of interpreting individual GWAS SNPs. Interestingly, recent results in the literature support our conclusion that cosmopolitan loci are more widespread than previously thought. For example, it was not until recently that the most established bona fide *TCF7L2* locus for T2D in Europeans was also confirmed in African ancestry groups in an extensive study that included 17 African American GWA samples.<sup>7</sup> This is a locus that was identified in the present study, which included only one African American sample.

The T2D-associated common genetic variation in *TCF7L2* is well established, but the mechanism by which risk of disease is conferred remains elusive. Our refined localization of this locus reveals that this is a regulatory site for the distant nuclear-encoded mitochondrial gene, *GPAM*, and identifies additional candidate causal variants. *GPAM* is interesting as it is a key rate-limiting enzyme in lipogenesis and highly expressed in liver and adipose tissue. Nuclear-encoded mitochondrial genes are of particular interest in relation to T2D, since mitochondrial function has been demonstrated to impact upon a myriad of molecular and cellular functional processes implicated in T2D.<sup>24–26</sup> However, to date human genetic association studies have identified few, if any, nuclear-encoded mitochondrial genes that directly confer risk of T2D in its common form. In this study we have identified at least 11 further nuclear-encoded mitochondria genes, which are regulated by eQTLs that also appear to confer risk of T2D. This indicates that one of the molecular mechanisms

that contribute to inherited risk of T2D is mitochondrial dysfunction in relation to energy metabolism. These findings are also supported by an independent study design that utilizes transcriptome and proteome data to reconstruct metabolic pathways in myocytes and identify the same mitochondrial pathways implicated in our study for adipose tissue (namely, fatty acid beta-oxidation, Krebs cycle, pyruvate metabolism, and branched-chain amino acid [valine, leucine, and isoleucine] metabolism).<sup>27</sup>

Recent large-scale whole-genome and -exome association studies<sup>28</sup> have empirically questioned any major role for coding variants in the etiology of T2D and therefore make regulatory loci such as the ones highlighted in this study all the more important to investigate. We believe that the targeted re-sequencing of informative refined regions using case-control data has the power to dissect the genetic epidemiology of T2D. While imputation methods can successfully infer missing genotypes for most genomic regions using population data as the reference data, ironically it appears that imputation methods are likely to fail to impute or to make correct inferences where it matters most (e.g., at disease loci with allelic spectra that differ from the general population). This important point requires further investigation.

Chromatin analyses and targeted re-sequencing of these refined regions can be used to identify potential causal variant locations. The two identified signals (*ACTL7B* and *KCNK3*) that we have investigated lends support to this approach. A cosmopolitan disease location interval that includes *KCNK3* was observed to be a hotspot for the regulation of six neighboring genes, with *OTOF* of particular interest because of its known association with hearing loss (autosomal-recessive forms of deafness<sup>29</sup>). According to the NIDDK, the prevalence of low- or mid-frequency hearing impairment among diabetics is three times that of non-diabetics (28% compared with 9%)<sup>30</sup> with the potential mechanism operating via microvascular and neural damage due to long-term hyperglycemia.<sup>31</sup> Interestingly, adipose gene expression for *OTOF* has also been previously shown to be associated with BMI in the morbidly obese,<sup>29</sup> providing further evidence of a functional role through a regulatory mechanism. Targeted re-sequencing within the *KCNK3* location interval identified candidate causal variants with large effect sizes. As with the *TCF7L2* locus, the T2D and eQTL locations were found to reside in pancreatic islet enhancer and *FOXA2* transcription factor-binding sites. Studies have shown that dysregulation of islet enhancers is relevant to the underlying mechanisms of T2D<sup>22</sup> and a recent examination of some of the previously found T2D loci have been found to overlap with *FOXA2*-bound sites.<sup>32</sup>

The cosmopolitan T2D location interval near *ACTL7B* overlapped with chromatin peaks for CD14<sup>+</sup> monocytes and included an eQTL for *KLF4* and *EPB41L4B*. *KLF4* is highly expressed in CD14<sup>+</sup> monocytes and belongs to the Krüppel-like factor (KLF) family that consists of transcription factors that can activate or repress different genes

involved in processes such as differentiation, development, and cell cycle progression, with several of these proteins implicated in glucose homeostasis.<sup>33</sup> *Klf4* is also used experimentally to induce pluripotent cells that can differentiate into insulin-producing cells.<sup>34</sup> *EPB41LAB* codes for an erythrocyte membrane protein (EMP) with greatly increased EMP glycosylation observed in T2D-affected subjects<sup>35</sup> with likely clinical implications.<sup>36</sup> It is recognized clinically that both obesity and T2D are associated with a state of abnormal inflammatory response. Here we show that the T2D variants and eQTL locations for *KLF4* and *EPB41LAB* reside in regions with chromatin modifications mainly observed in CD14<sup>+</sup> monocytes. Monocytes play a pivotal role in innate immunity and are involved in metabolic regulation.<sup>37</sup> It has been shown that unbalanced proinflammatory/anti-inflammatory markers of CD14<sup>+</sup> cells is associated with metabolic disorder in obese T2D-affected individuals.<sup>38</sup> *KLF4* is a critical regulator of monocyte differentiation<sup>39</sup> and *EPB41LAB* expression in subcutaneous and omental adipose is strongly associated with BMI in morbidly obese individuals.<sup>20</sup> Therefore, these T2D intragenic variants and the regulated *cis*-genes (*KLF4* and *EPB41LAB*) are likely to be involved in an inflammatory pathway for obesity and T2D.

The complex causal chain between a gene and its effect on susceptibility cannot be unravelled until we have a full understanding of the regulatory genetic architecture that underpins T2D and until the causal changes have been localized in the DNA sequence.<sup>40</sup> Our results show that disease-associated loci in different populations, gene expression, and cell-specific regulatory annotation can be effectively integrated by localizing these effects on high-resolution linkage disequilibrium maps. By exploiting these maps to refine causal location estimates, we have identified a genomic catalog of cosmopolitan and European disease loci with correspondingly important clinical implications that provides important molecular insights and opportunities to understand the molecular basis of this devastating common disease.

### Supplemental Data

Supplemental Data include two figures, two tables, and Supplemental Methods and can be found with this article online at <http://dx.doi.org/10.1016/j.ajhg.2017.04.007>.

### Acknowledgments

We would like to thank the WTCCC, UK, for making the WTCCC T2D genomic data available. A full list of the investigators who contributed to the generation of the data is available from <http://www.wtccc.org.uk>. We are grateful to the NIDDK for making the AA T2D phenotype and genomic data available to us. The NIDDK whole-genome association search for T2D genes in African Americans was conducted by Donald Bowden, Center for Human Genomics, Center for Diabetes Research, Wake Forest University School of Medicine, with support from the NIDDK. The datasets used were obtained from the database of Genotypes

and Phenotypes (dbGaP) at accession number phs000140. This manuscript was not prepared in collaboration with the labs of any of the investigators responsible for generating the data, and does not necessarily reflect the views or opinions of these investigators. T.A. would like to acknowledge the Medical Research Council UK (Investigator Award 91993) for supporting his work. All authors are grateful to Professor Dallas Swallow (UCL) for her valuable comments on the manuscript, Professor Philippe Froguel (Imperial College, CNRS 8199, EGID 59045) for generously supplying us with European DNA samples for the NGS pilot work, and Aminah Ali (UCL) for her valuable contributions to processing the NGS data. N.M. would like to acknowledge Newton E. Morton (University of Southampton) for the previous body of work on LDU maps.

Received: December 12, 2016

Accepted: April 11, 2017

Published: May 4, 2017

### Web Resources

1000 Genomes, <http://www.internationalgenome.org/>

dbGaP, <http://www.ncbi.nlm.nih.gov/gap>

International HapMap Project, <ftp://ftp.ncbi.nlm.nih.gov/hapmap/>

Islet Regulome Browser, <http://gattaca.imppc.org/isletregulome/home>

OMIM, <http://www.omim.org/>

Roadmap, <http://www.roadmapepigenomics.org/>

### References

1. Altshuler, D., and Daly, M. (2007). Guilt beyond a reasonable doubt. *Nat. Genet.* 39, 813–815.
2. Lebovitz, H.E. (1999). Type 2 diabetes: an overview. *Clin. Chem.* 45, 1339–1345.
3. Mahajan, A., Go, M.J., Zhang, W., Below, J.E., Gaulton, K.J., Ferreira, T., Horikoshi, M., Johnson, A.D., Ng, M.C., Prokopenko, I., et al.; DIAbetes Genetics Replication And Meta-analysis (DIAGRAM) Consortium; Asian Genetic Epidemiology Network Type 2 Diabetes (AGEN-T2D) Consortium; South Asian Type 2 Diabetes (SAT2D) Consortium; Mexican American Type 2 Diabetes (MAT2D) Consortium; and Type 2 Diabetes Genetic Exploration by Next-generation sequencing in multi-Ethnic Samples (T2D-GENES) Consortium (2014). Genome-wide trans-ancestry meta-analysis provides insight into the genetic architecture of type 2 diabetes susceptibility. *Nat. Genet.* 46, 234–244.
4. Morris, A.P., Voight, B.F., Teslovich, T.M., Ferreira, T., Segrè, A.V., Steinthorsdottir, V., Strawbridge, R.J., Khan, H., Grallert, H., Mahajan, A., et al.; Wellcome Trust Case Control Consortium; Meta-Analyses of Glucose and Insulin-related traits Consortium (MAGIC) Investigators; Genetic Investigation of Anthropometric Traits (GIANT) Consortium; Asian Genetic Epidemiology Network–Type 2 Diabetes (AGEN-T2D) Consortium; South Asian Type 2 Diabetes (SAT2D) Consortium; and DIAbetes Genetics Replication And Meta-analysis (DIAGRAM) Consortium (2012). Large-scale association analysis provides insights into the genetic architecture and pathophysiology of type 2 diabetes. *Nat. Genet.* 44, 981–990.
5. Li, Y.R., and Keating, B.J. (2014). Trans-ethnic genome-wide association studies: advantages and challenges of mapping in diverse populations. *Genome Med.* 6, 91.

6. Asimit, J.L., Hatzikotoulas, K., McCarthy, M., Morris, A.P., and Zeggini, E. (2016). Trans-ethnic study design approaches for fine-mapping. *Eur. J. Hum. Genet.* *24*, 1330–1336.
7. Ng, M.C., Shriner, D., Chen, B.H., Li, J., Chen, W.M., Guo, X., Liu, J., Bielinski, S.J., Yanek, L.R., Nalls, M.A., et al.; FIND Consortium; eMERGE Consortium; DIAGRAM Consortium; MuTHER Consortium; and Meta-analysis of type 2 Diabetes in African Americans Consortium (2014). Meta-analysis of genome-wide association studies in African Americans provides insights into the genetic architecture of type 2 diabetes. *PLoS Genet.* *10*, e1004517.
8. Direk, K., Lau, W., Small, K.S., Maniatis, N., and Andrew, T. (2014). ABCG5 transporter is a novel type 2 diabetes susceptibility gene in European and African American populations. *Ann. Hum. Genet.* *78*, 333–344.
9. Elding, H., Lau, W., Swallow, D.M., and Maniatis, N. (2013). Refinement in localization and identification of gene regions associated with Crohn disease. *Am. J. Hum. Genet.* *92*, 107–113.
10. Zhang, X., Bailey, S.D., and Lupien, M. (2014). Laying a solid foundation for Manhattan—setting the functional basis for the post-GWAS era'. *Trends Genet.* *30*, 140–149.
11. Wellcome Trust Case Control Consortium (2007). Genome-wide association study of 14,000 cases of seven common diseases and 3,000 shared controls. *Nature* *447*, 661–678.
12. Voight, B.F., Kang, H.M., Ding, J., Palmer, C.D., Sidore, C., Chines, P.S., Burt, N.P., Fuchsberger, C., Li, Y., Erdmann, J., et al. (2012). The metabochip, a custom genotyping array for genetic studies of metabolic, cardiovascular, and anthropometric traits. *PLoS Genet.* *8*, e1002793.
13. Palmer, N.D., McDonough, C.W., Hicks, P.J., Roh, B.H., Wing, M.R., An, S.S., Hester, J.M., Cooke, J.N., Bostrom, M.A., Rudock, M.E., et al.; DIAGRAM Consortium; and MAGIC Investigators (2012). A genome-wide association search for type 2 diabetes genes in African Americans. *PLoS ONE* *7*, e29202.
14. Maniatis, N., Collins, A., and Morton, N.E. (2007). Effects of single SNPs, haplotypes, and whole-genome LD maps on accuracy of association mapping. *Genet. Epidemiol.* *31*, 179–188.
15. Maniatis, N., Collins, A., Gibson, J., Zhang, W., Tapper, W., and Morton, N.E. (2004). Positional cloning by linkage disequilibrium. *Am. J. Hum. Genet.* *74*, 846–855.
16. Maniatis, N., Collins, A., Xu, C.F., McCarthy, L.C., Hewett, D.R., Tapper, W., Ennis, S., Ke, X., and Morton, N.E. (2002). The first linkage disequilibrium (LD) maps: delineation of hot and cold blocks by diplotype analysis. *Proc. Natl. Acad. Sci. USA* *99*, 2228–2233.
17. Grundberg, E., Small, K.S., Hedman, A.K., Nica, A.C., Buil, A., Keildson, S., Bell, J.T., Yang, T.P., Meduri, E., Barrett, A., et al.; Multiple Tissue Human Expression Resource (MuTHER) Consortium (2012). Mapping cis- and trans-regulatory effects across multiple tissues in twins. *Nat. Genet.* *44*, 1084–1089.
18. Vionnet, N., Hani, E.H., Dupont, S., Gallina, S., Francke, S., Dotte, S., De Matos, F., Durand, E., Leprêtre, F., Lecoeur, C., et al. (2000). Genomewide search for type 2 diabetes-susceptibility genes in French whites: evidence for a novel susceptibility locus for early-onset diabetes on chromosome 3q27-qter and independent replication of a type 2-diabetes locus on chromosome 1q21-q24. *Am. J. Hum. Genet.* *67*, 1470–1480.
19. Meyre, D., Lecoeur, C., Delplanque, J., Francke, S., Vatn, V., Durand, E., Weill, J., Dina, C., and Froguel, P. (2004). A genome-wide scan for childhood obesity-associated traits in French families shows significant linkage on chromosome 6q22.31-q23.2. *Diabetes* *53*, 803–811.
20. Greenawalt, D.M., Dobrin, R., Chudin, E., Hatoum, I.J., Suver, C., Beaulaurier, J., Zhang, B., Castro, V., Zhu, J., Sieberts, S.K., et al. (2011). A survey of the genetics of stomach, liver, and adipose gene expression from a morbidly obese cohort. *Genome Res.* *21*, 1008–1016.
21. Consortium, E.P.; and ENCODE Project Consortium (2011). A user's guide to the encyclopedia of DNA elements (ENCODE). *PLoS Biol.* *9*, e1001046.
22. Pasquali, L., Gaulton, K.J., Rodríguez-Seguí, S.A., Mularoni, L., Miguel-Escalada, I., Akerman, I., Tena, J.J., Morán, I., Gómez-Marín, C., van de Bunt, M., et al. (2014). Pancreatic islet enhancer clusters enriched in type 2 diabetes risk-associated variants. *Nat. Genet.* *46*, 136–143.
23. Trynka, G., Sandor, C., Han, B., Xu, H., Stranger, B.E., Liu, X.S., and Raychaudhuri, S. (2013). Chromatin marks identify critical cell types for fine mapping complex trait variants. *Nat. Genet.* *45*, 124–130.
24. Lowell, B.B., and Shulman, G.I. (2005). Mitochondrial dysfunction and type 2 diabetes. *Science* *307*, 384–387.
25. Mootha, V.K., Lindgren, C.M., Eriksson, K.F., Subramanian, A., Sihag, S., Lehar, J., Puigserver, P., Carlsson, E., Ridderstråle, M., Laurila, E., et al. (2003). PGC-1 $\alpha$ -responsive genes involved in oxidative phosphorylation are coordinately downregulated in human diabetes. *Nat. Genet.* *34*, 267–273.
26. Patti, M.E., and Corvera, S. (2010). The role of mitochondria in the pathogenesis of type 2 diabetes. *Endocr. Rev.* *31*, 364–395.
27. Väre, L., Scheele, C., Broholm, C., Mardinoglu, A., Kampf, C., Asplund, A., Nookaew, I., Uhlén, M., Pedersen, B.K., and Nielsen, J. (2015). Proteome- and transcriptome-driven reconstruction of the human myocyte metabolic network and its use for identification of markers for diabetes. *Cell Rep.* *11*, 921–933.
28. Fuchsberger, C., Flannick, J., Teslovich, T.M., Mahajan, A., Agarwala, V., Gaulton, K.J., Ma, C., Fontanillas, P., Moutsianas, L., McCarthy, D.J., et al. (2016). The genetic architecture of type 2 diabetes. *Nature* *536*, 41–47.
29. Duman, D., and Tekin, M. (2012). Autosomal recessive non-syndromic deafness genes: a review. *Front. Biosci. (Landmark Ed.)* *17*, 2213–2236.
30. Bainbridge, K.E., Hoffman, H.J., and Cowie, C.C. (2008). Diabetes and hearing impairment in the United States: audiometric evidence from the National Health and Nutrition Examination Survey, 1999 to 2004. *Ann. Intern. Med.* *149*, 1–10.
31. Bainbridge, K.E., Cheng, Y.J., and Cowie, C.C. (2010). Potential mediators of diabetes-related hearing impairment in the U.S. population: National Health and Nutrition Examination Survey 1999–2004. *Diabetes Care* *33*, 811–816.
32. Gaulton, K.J., Ferreira, T., Lee, Y., Raimondo, A., Mägi, R., Reschen, M.E., Mahajan, A., Locke, A., Rayner, N.W., Robertson, N., et al.; Diabetes Genetics Replication And Meta-analysis (DIAGRAM) Consortium (2015). Genetic fine mapping and genomic annotation defines causal mechanisms at type 2 diabetes susceptibility loci. *Nat. Genet.* *47*, 1415–1425.
33. Gray, S., Feinberg, M.W., Hull, S., Kuo, C.T., Watanabe, M., Sen-Banerjee, S., DePina, A., Haspel, R., and Jain, M.K. (2002). The Krüppel-like factor KLF15 regulates the insulin-sensitive glucose transporter GLUT4. *J. Biol. Chem.* *277*, 34322–34328.
34. Noguchi, H. (2009). Recent advances in stem cell research for the treatment of diabetes. *World J. Stem Cells* *1*, 36–42.

35. Yamaguchi, M., Nakamura, N., Nakano, K., Kitagawa, Y., Shigetani, H., Hasegawa, G., Ienaga, K., Nakamura, K., Nakazawa, Y., Fukui, I., et al. (1998). Immunochemical quantification of crossline as a fluorescent advanced glycation endproduct in erythrocyte membrane proteins from diabetic patients with or without retinopathy. *Diabet. Med.* *15*, 458–462.
36. Adewoye, E.O., Akinlade, K.S., and Olorunsogo, O.O. (2001). Erythrocyte membrane protein alteration in diabetics. *East Afr. Med. J.* *78*, 438–440.
37. Fernández-Real, J.M., and Pickup, J.C. (2008). Innate immunity, insulin resistance and type 2 diabetes. *Trends Endocrinol. Metab.* *19*, 10–16.
38. Satoh, N., Shimatsu, A., Himeno, A., Sasaki, Y., Yamakage, H., Yamada, K., Suganami, T., and Ogawa, Y. (2010). Unbalanced M1/M2 phenotype of peripheral blood monocytes in obese diabetic patients: effect of pioglitazone. *Diabetes Care* *33*, e7.
39. Feinberg, M.W., Wara, A.K., Cao, Z., Lebedeva, M.A., Rosenbauer, F., Iwasaki, H., Hirai, H., Katz, J.P., Haspel, R.L., Gray, S., et al. (2007). The Kruppel-like factor KLF4 is a critical regulator of monocyte differentiation. *EMBO J.* *26*, 4138–4148.
40. Morton, N.E. (2005). Linkage disequilibrium maps and association mapping. *J. Clin. Invest.* *115*, 1425–1430.

**The American Journal of Human Genetics, Volume 100**

**Supplemental Data**

**High-Resolution Genetic Maps Identify Multiple  
Type 2 Diabetes Loci at Regulatory Hotspots  
in African Americans and Europeans**

**Winston Lau, Toby Andrew, and Nikolas Maniatis**

---

## SUPPLEMENTARY METHODS

---

### WELLCOME TRUST CASE CONTROL CONSORTIUM AND AFRICAN AMERICAN SAMPLE SELECTION

The Wellcome Trust Case Control Consortium (WTCCC phase I) described the diagnosis and selection of T2D cases for the original study as “based on either current prescribed treatment with sulphonylureas, biguanides, other oral agents and/or insulin or, in the case of individuals treated with diet alone, historical or contemporary laboratory evidence of hyperglycaemia (as defined by the World Health Organization)”<sup>1</sup>. The two pooled control groups from the 1958 Birth Cohort (aged 44-45) and the UK Blood Service (aged 18-69) are used as shared controls for all seven disease cases (including T2D) in the original study<sup>1</sup>, which implies that the controls cannot be assumed to be group matched by BMI, age or sex. The WTCCC2 (phase II) indirectly describes case selection in relation to the MetaboChip array design<sup>2</sup>, which targets T2D genomic disease loci identified by the DIAGRAM consortium<sup>3</sup>. Although the T2D diagnostic criteria used by the >20 participating research groups varied, most used ADA<sup>4; 5</sup> and WHO<sup>6</sup> guidelines and/or based on treatment with oral anti-diabetic medication or insulin<sup>3</sup>. The National Institute of Diabetes and Digestive and Kidney Diseases (NIDDK)<sup>7</sup> recruited individuals with T2DM and End Stage Renal Disease (ESRD) from dialysis facilities, with the stipulation that cases had to meet at least one of the following three criteria to be included: i) T2DM diagnosed at least 5 years before initiating renal replacement therapy; ii) diabetic retinopathy and/or c) diabetic nephropathy (T2D-ESRD cases).

Given the WTCCC groups did not specify if case and controls were matched by BMI, it cannot be ruled out that gene-mapping studies based upon these European samples might identify genetic loci that are confounded by BMI / adiposity rather than being associated with T2D alone. By contrast, this possibility is to some extent mitigated for this study, where the National Institute of



Diabetes and Digestive and Kidney Diseases (NIDDK)<sup>7</sup> samples are BMI matched. WTCCC1 used population controls, which (as noted in the publication<sup>1</sup>) reduces power due the control group including an expected proportion of T2D cases equal to the population prevalence. No published documentation for the selection of WTCCC2 controls is recorded<sup>8</sup>. For the NIDDK, unrelated African-American controls screened for no diagnosis of diabetes or renal disease were recruited from the community and internal medicine clinics (controls)<sup>7</sup>. This suggests that where cosmopolitan T2D disease loci (i.e. the co-location of disease loci for European and African American samples) are identified in this study, we can be more confident that these are not confounded by BMI/ adiposity.

#### TARGETED RE-SEQUENCING - EUROPEAN CASE/CONTROL SAMPLES

For the purposes of targeted re-sequencing at the loci *ACTL7B*, *KCNK3* and *TCF7L2*, we used French samples with cases selected from multiplex families from linkage studies with a history of T2D<sup>9; 10</sup> and unrelated controls selected from families with obese individuals, but no history of T2D<sup>11; 12</sup> and 1:1 matched for age, sex and body mass index (BMI, see Table S2).

#### CONSTRUCTION OF THE GENETIC LDU MAPS

HapMap (Release 28) was used to construct genetic maps for the European samples using 56 unrelated European (EUR) individuals genotyped for 2,270,218 SNPs (screened for quality control) and a second genetic map constructed for the African-American samples using 57 unrelated individuals of African ancestry from South West USA (ASW) genotyped for 1,333,297 quality-control SNPs. The Linkage Disequilibrium (LD) maps are based upon HapMap data with genetic distance provided in additive LD units (LDU). The power of the multi-marker approach

compared with conventional GWA analysis (single-SNP tests) is primarily provided by the additional information contained in the high-resolution LDU genetic maps<sup>13-15</sup> and the reduced number of genomic tests that reduces the multiple-testing burden. The construction of the LDU maps is based on the Malécot-Morton model, which describes the observed decline of pair-wise LD between SNPs as measured by rho,  $\rho$ , as an exponential function of physical distance in kilobases ( $d$ ). The expected decline in pairwise LD is modelled as:  $\hat{\rho} = (1-L)Me^{-\varepsilon d} + L$ , with  $M$  being the intercept, reflecting the maximum value of LD prior to LD breakdown ( $\sim 1$  for monophyletic origin, i.e. one ancestral haplotype) and  $L$  being the asymptote, reflecting spurious LD at large distance, not due to linkage. The parameter  $\varepsilon$  is the exponential decline of LD and, together with distance  $d$ , in kb, an estimate of LDU =  $\sum \varepsilon d_i$  is provided for every  $i$ th interval. In this way, all SNPs in the T2D datasets have genetic locations measured in LDU<sup>16</sup>. The parameters  $M$ ,  $L$  and  $\varepsilon$  are the iterative maximum likelihood estimations. The autosomal genome was divided into 4,800 non-overlapping analytical windows of approximately equal size on the genetic map.

#### ASSOCIATION MAPPING USING LDU MAPS

We carried out association analyses for all autosomal chromosomes using three T2D datasets with a total of 5,800 cases and 9,691 controls. The first genome-wide association (GWA) dataset was obtained from the WTCCC (phase I) and included T2D cases ( $n=1,925$ ) and controls ( $n=2,938$ ) of North European ancestry with available genotypes (Affymetrix,  $\sim 500K$  SNPs)<sup>1; 2; 7</sup>. The second independent dataset was also from the WTCCC (phase II), and included T2D cases ( $n=2,910$ ) and controls ( $n=5,724$ ) of North European ancestry (UK)<sup>2</sup>, who were genotyped using the MetaboChip array (Illumina,  $\sim 200K$  SNPs). The third dataset was obtained from a GWA study for a population of predominantly African ancestry conducted by the NIDDK<sup>7</sup> and included African American

(AA) T2D cases (965) and AA controls (1029). The AA NIDDK T2D cases and controls were genotyped at a much higher SNP resolution array (Affymetrix, ~1M SNPs)<sup>7</sup>. All three datasets were screened using standard quality control filters described in previous publications<sup>1; 2; 7</sup> and online data sources. For the eQTLs analysis we used data generated by the MuTHER consortium<sup>17</sup>. Subcutaneous adipose mRNA levels were measured in 825 European twins (TwinsUK) by the MuTHER consortium with data generation and normalization methods described in their initial report and online data sources<sup>17</sup>.

The multi-marker association test<sup>18</sup> is based on composite likelihood ( $\mathcal{L}$ )<sup>16; 19</sup>, in which all observed genotyped SNPs within each window are simultaneously tested. We therefore do not use imputation and conditional analysis, because the aim of LDU analysis is to estimate the location of functional variants in any given genomic region that provides the strongest evidence of association with disease. For this approach observed (not imputed missing) genotype data are required for reasons explained in the main manuscript. Application of this method to each analytical window returns one estimated location ( $\hat{S}$ ) for the causal variant ( $\pm$  standard error) at the strongest signal, along with the association test  $P$ -value. The association test is based upon the same Malécot model used to construct the LDU maps described above, although in this case the T2D-by-SNP association ( $z$ )<sup>14</sup> is included in the model instead of SNP-by-SNP association ( $\rho$ ), along with an additional parameter of causal variant location ( $\hat{S}$ ), with all distances measured in LDU. Therefore the Malécot model prediction of association between disease and markers is estimated by the equation  $\hat{z}_i = (1-L)Me^{-\epsilon_1(S_i - \hat{S})} + L$ , where  $S_i$  the  $i$ th SNP LDU location and  $\hat{S}$  the estimated location of the putative functional variant on the genetic LDU map. The genetic distance standard errors of  $\hat{S}$  were used to obtain the 95% confidence intervals (CI) of the putative causal

variants<sup>14</sup>, but in this study we only present the co-location intervals (distance between the  $\hat{S}$  location estimates), which are the genomic regions within the CIs that most plausibly include the functional variants that confer risk of T2D. For the three gene regions used as examples (Figures 2, 3 and 4 in the manuscript), we constructed LDU maps from the 1000 Genomes Project data, but no differences on the T2D locations estimates were observed based upon the 1000G and HapMap LDU maps.

The regression coefficient  $b$  was used instead of  $z$  for the adipose expression quantitative phenotype (eQTL analysis). All the regression coefficients, standard errors and  $P$ -values for expression probes regressed upon SNPs and probe corresponding gene names were obtained from the MuTHER website (<http://www.muther.ac.uk>). Our eQTL analysis targeted 173 replicated T2D signals (111 additional loci in Table 1, 62 from the previously found list<sup>20</sup>). The Malécot model was then applied after assigning the EUR LDU locations to the SNPs used from the MuTHER data for these 173 signals. The MuTHER probe gene names were updated based on common nomenclature as provide by the UCSC website and to be consistent with the publications that we have referenced in the manuscript.

For convenience, all the functional location estimates ( $\hat{S}$ ) for T2D and eQTLs were converted back to the physical map Build 36 (B36, NCBI36/hg18) in kb by linear interpolation of the two flanking SNPs on the HapMap LDU map. When the  $\hat{S}$  was located in an LDU block (horizontal LDU line) then all markers within that block have the same LDU location. In such cases, we took the midpoint of that block as an estimate of  $\hat{S}$  in kb. All eQTL locations ( $\hat{S}$ ) had to co-locate within 50kb from the T2D  $\hat{S}$  estimates. A detailed description of the Malécot multi-marker test of association is

provided by Maniatis et al.<sup>18</sup> and the construction of the LDU maps for this study using the HapMap phase II data are described in more detail elsewhere<sup>14; 16</sup>.

Analytical window *P*-values were meta-analysed using Fisher's method to provide overall evidence of association. We did not use other types of meta-analysis (e.g. fixed or random effects), because the multi-marker test of association estimates the causal variant location, but not the association effect size. In order to account for multiple testing, analytical windows were filtered for having a meta *P*-value less than the Bonferroni corrected, genomic *P*-value threshold of  $1 \times 10^{-5}$ , based on the total number of tests performed ( $n=4,800$ ;  $\alpha = 0.05/4,800$ ). Loci were only considered biologically plausible if the significant  $\hat{S}$  location estimates from different datasets were within a <100 kb interval.

For the eQTL analysis, adipose tissue expression probes were tested for *cis*-association and co-localization, with *cis* defined in this study to be within  $\pm 1.5$  Mb distance either side of the replicated T2D causal location estimate. This approach provided eQTL location estimates on the LDU maps after Bonferroni correction for the total number of probes tested per 3Mb window. If the eQTL location estimate was within 50kb of the disease susceptibility location, this locus was considered to be a disease eQTL (i.e. associated with both T2D and *cis*-gene expression) and only these eQTL are presented in the result tables. The results table includes a column for the list of *cis*-genes regulated by identified T2D disease loci.

Here we make an important distinction between an eQTL and an eSNP, which relates to ability to make functional inferences about disease loci. In this study an eQTL is defined by a location

estimate for a putative functional variant(s) that regulates gene expression levels for one or more neighbouring genes in a relevant tissue *and* is associated with T2D. In other words, a potential molecular mechanism is immediately suggested for how risk may be conferred by a disease locus, which previously was unknown. By contrast, an eSNP study is defined only by the location of a SNP that is most strongly associated with neighbouring gene expression levels (and may or may not be associated with disease). For eSNP studies, the problems of inconsistency between different lead SNPs associated with disease and expression, between different arrays and across different populations can only be indirectly addressed using genotype imputation methods<sup>21; 22</sup>. For this study it has been established that the majority of the 111 additional susceptibility loci are also eQTLs. This implies that these disease loci may confer risk of T2D, at least in part, via the *cis*-regulation of expression levels for a large number of neighbouring genes (conservatively, a total of 173 genomic disease loci, both new and previously known, that regulate the expression levels of a further 266 *cis*-genes).

Our final set of *cis*-genes (from Tables 1, 2 and S1) were then further investigated in order to identify which adipose and liver gene expression profiles have previously also shown evidence of association with body mass index (BMI), a well-established co-morbidity of T2D. We used the results generated by an independent gene expression study<sup>23</sup> which was based upon 701 subcutaneous adipose and liver samples collected at Massachusetts General Hospital (MGH study) from morbidly obese individuals (BMI >30) who underwent Roux-en-Y gastric bypass surgery.

## PREVIOUSLY KNOWN T2D LOCI

We also analysed 76 previously known T2D loci<sup>20</sup> to obtain refined location estimates on the same genetic maps. For these loci, we undertook commensurable association analyses by centralising the analytical window on the reported lead SNP. These 76 windows were then examined using the same procedures described above to identify T2D locations and assess whether these are eQTL or not. We confirmed 62 out of 76 loci (signals 112-173) and provide T2D location estimates along with associated *cis*-regulated genes in the supplementary Table S1 (including one, signal 174, from our previous work<sup>24</sup>). Results from the further investigation of the *TCF7L2* locus (signal 117) are provided in the main manuscript. Other notable examples from the supplementary Table S1 are the *HHEX* (signal 149, [MIM: 604420]) and *FTO* (signal 152, [MIM: 610966]). *HHEX* is observed to regulate *MARCH5* [MIM: 610637] expression levels, which codes for a mitochondrial E3 ubiquitin-protein ligase that plays a crucial role in the control of mitochondrial morphology by acting as a positive regulator of mitochondrial fission<sup>25</sup>. This is the first time a mitochondrial fission gene has been implicated as a risk factor for metabolic disease. Despite testing T2D and not obesity, we observed *FTO* to also be a European T2D disease susceptibility locus with a co-located eQTL that regulates *IRX3*<sup>26</sup> [MIM: 612985]. It is possible this observed association may reflect that the Wellcome Trust T2D cases for this study are overweight and/or poorly matched for BMI with the controls<sup>1; 2</sup>. However, we do not present this result in the table, because while nominally significant ( $P=0.03$ ) and similar to previous studies<sup>26</sup>, the eQTL location for *IRX3* did not pass Bonferroni correction for the total number of probes tested for this window. We also observed an eQTL within the promoter of *IRX3* that regulates *IRX5* [MIM: 606195], but we did not further investigate the regulatory landscape of *IRX3*, since the focus of this study was to

identify T2D loci that are also eQTL. The *IRX3* was not observed to be associated with T2D either for this or in other studies.



**Supplementary Figure S1:** No relationship between the distance of the eQTL to the nearest gene (Y-axis) and the distance of the eQTL from the corresponding *cis*-regulated gene (X-axis).

This regression analysis plot demonstrates that the practice of giving the nearest genes in GWA studies is misleading, since the implicated functional genes the eQTLs regulate are just as likely to be distant or near to the eQTL. The same analysis of the Y and X variables, but only including signals where the distance between T2D sample location estimates (Tables 1 and 2) were < 5kb yielded the same result ( $P > 0.05$ ).

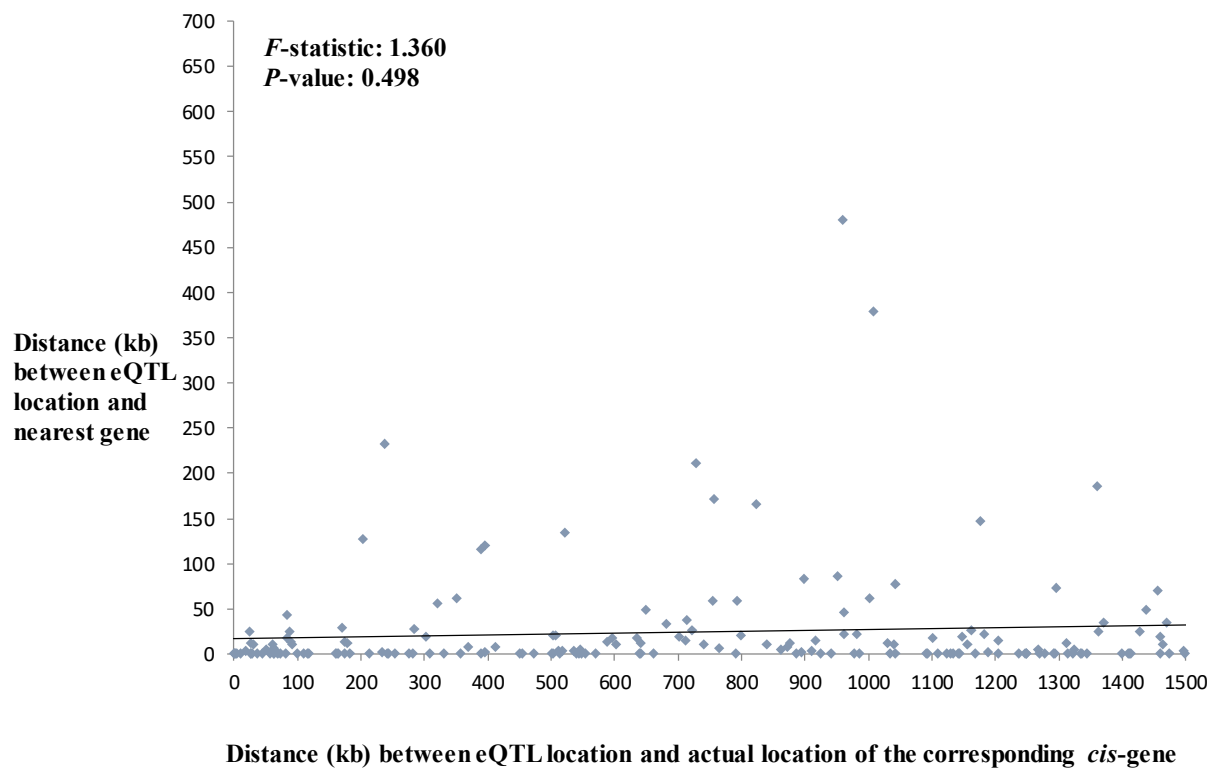

**Supplementary Figure S2:** No relationship between the distance of the eQTL to the T2D location (Y-axis) and the distance between T2D sample location estimates (X-axis; i.e. between EUR and AA in Table 1 and between the two EUR samples in Table 2).

This regression analysis plot shows no relationship between eQTL co-location and disease co-location and demonstrates that the threshold of <100kb used as the criterion for considering estimated disease loci to be co-located and replicated, does not introduce any bias compared to the more conservative threshold of <50kb for the co-location of disease and eQTL.

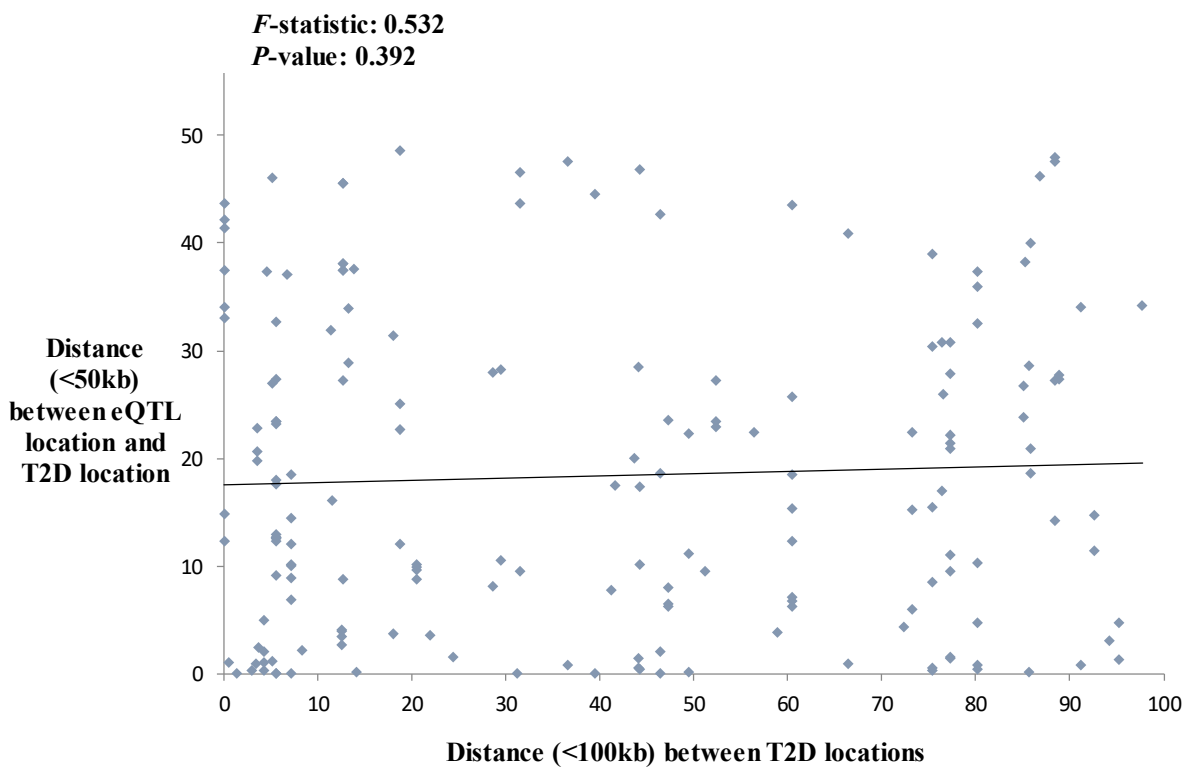

**Table S1. Refined information on the previously known T2D loci and their regulatory role of neighbouring gene expression**

All locations and distances are given in build 36; <sup>a</sup>Replication with the WTCCC (W), NIDDK AA (A), Metaboship (M) datasets; <sup>a</sup>T2D associated intervals in kb (<100) that harbour T2D locations between datasets; <sup>b</sup>Location estimates for the European (E) GWAS; <sup>c</sup>Location estimates for the African-American (A) GWAS; <sup>d</sup>Location estimates for the Metaboship European (E) samples, signals with low SNP coverage ‘-’ were not meta-analysed; <sup>e</sup>Genes in bold denote the intragenic localization and genes with ‘+’ for self-regulatory; <sup>f</sup>Number of *cis*-genes regulated by the eQTL; <sup>g</sup>List of *cis*-genes associated with eQTLs that co-located within <50kb of the T2D locations on the genetic maps; *cis*-genes with ‘\*’ have previously shown evidence of association between Body Mass Index for morbidly obese and adipose/liver expression profiles<sup>23</sup>; <sup>h</sup>Distance in kb (<50) between eQTL and T2D locations, the minimum is given when more than one *cis*-gene is implicated. Previously observed loci for signals 112-173 are derived from<sup>20</sup> and signal 174 from<sup>24</sup>.

| Signal | Known locus     | Lead SNP   | Lead SNP b36 | chr | Data <sup>¶</sup> | Meta P-value | Distance between locations <sup>a</sup> | T2D location GWAS-E <sup>b</sup> | T2D location GWAS-A <sup>c</sup> | T2D location metabo-E <sup>d</sup> | Nearest gene to T2D locations <sup>e</sup> | no. of <i>cis</i> -genes <sup>f</sup> | eQTL associated <i>cis</i> -genes <sup>g</sup>                                                           | eQTL distance from T2D <sup>h</sup> |
|--------|-----------------|------------|--------------|-----|-------------------|--------------|-----------------------------------------|----------------------------------|----------------------------------|------------------------------------|--------------------------------------------|---------------------------------------|----------------------------------------------------------------------------------------------------------|-------------------------------------|
| 112    | <i>BCL11A</i>   | rs243088   | 60422        | 2p  | WAM               | 4.22E-34     | 0                                       | 60441                            | 60427                            | 60441                              | <i>MIR4432</i>                             | 1                                     | <i>PEX13</i>                                                                                             | 31                                  |
| 113    | <i>TMEM154</i>  | rs6813195  | 153740       | 4q  | WAM               | 1.38E-08     | 1                                       | 153747                           | 153739                           | 153740                             | <i>TMEM154</i>                             | 0                                     | -                                                                                                        | -                                   |
| 114    | <i>ANKRD55</i>  | rs459193   | 55843        | 5q  | WAM               | 2.15E-14     | 2                                       | 55834                            | 55926                            | 55832                              | <b><i>LOC101928448</i></b>                 | 0                                     | -                                                                                                        | -                                   |
| 115    | <i>CDKALI</i>   | rs7756992  | 20788        | 6p  | WAM               | 5.99E-180    | 0                                       | 20787                            | 20750                            | 20787                              | <i>CDKALI</i>                              | 0                                     | -                                                                                                        | -                                   |
| 116    | <i>CDKN2A/B</i> | rs944801   | 22042        | 9p  | WAM               | 8.16E-41     | 1                                       | 21987                            | 21986                            | 22022                              | <b><i>CDKN2A/B</i></b>                     | 2                                     | <i>KIAA1797, MTAP</i>                                                                                    | 26                                  |
| 117    | <i>TCF7L2</i>   | rs7903146  | 114748       | 10q | WAM               | 3.55E-86     | 9                                       | 114736                           | 114745                           | 114737                             | <b><i>TCF7L2</i></b>                       | 1                                     | <i>GPAM</i>                                                                                              | 28                                  |
| 118    | <i>RBMS1</i>    | rs7569522  | 161055       | 2q  | WA                | 4.42E-21     | 95                                      | 160935                           | 160840                           | >100kb                             | <i>RBMS1</i>                               | 1                                     | <i>RBMS1*</i>                                                                                            | 4                                   |
| 119    | <i>KCNK16</i>   | rs1535500  | 39392        | 6p  | WA                | 1.04E-07     | 86                                      | 39505                            | 39419                            | -                                  | <i>KIF6</i>                                | 0                                     | -                                                                                                        | -                                   |
| 120    | <i>ZFAND6</i>   | rs11634397 | 78219        | 15q | WA                | 1.95E-03     | 67                                      | 78193                            | 78126                            | -                                  | <b><i>ZFAND6</i></b>                       | 0                                     | -                                                                                                        | -                                   |
| 121    | <i>TMEM163</i>  | rs6723108  | 135196       | 2q  | AM                | 3.54E-12     | 1                                       | >100kb                           | 135313                           | 135312                             | <b><i>ACMSD</i></b>                        | 0                                     | -                                                                                                        | -                                   |
| 122    | <i>KCNQ1</i>    | rs231361   | 2648         | 11p | AM                | 1.96E-14     | 15                                      | ns                               | 2648                             | 2663                               | <i>KCNQ1</i>                               | 0                                     | -                                                                                                        | -                                   |
| 123    | <i>KCNJ11</i>   | rs5215     | 17365        | 11p | AM                | 5.32E-26     | 2                                       | ns                               | 17384                            | 17382                              | <b><i>ABCC8</i></b>                        | 2                                     | <i>MYOD1, UEVLD</i>                                                                                      | 0                                   |
| 124    | <i>HNF1B</i>    | rs4430796  | 33172        | 17q | AM                | 1.21E-11     | 30                                      | ns                               | 33135                            | 33165                              | <b><i>HNF1B</i></b>                        | 0                                     | -                                                                                                        | -                                   |
| 125    | <i>PSMD6</i>    | rs12497268 | 64065        | 3p  | A                 | 1.87E-05     | -                                       | >100kb                           | 63759                            | -                                  | <i>C3orf49</i>                             | 0                                     | -                                                                                                        | -                                   |
| 126    | <i>HMGGA2</i>   | rs2261181  | 64499        | 12q | A                 | 5.53E-03     | -                                       | >100kb                           | 64404                            | ns                                 | <i>RPSAP52</i>                             | 0                                     | -                                                                                                        | -                                   |
| 127    | <i>MAEA</i>     | rs6815464  | 1300         | 4p  | A                 | 1.84E-03     | -                                       | ns                               | 1267                             | ns                                 | <i>MAEA</i>                                | 3                                     | <i>CTBPI, KIAA1530, CRIPAK*</i>                                                                          | 8                                   |
| 128    | <i>ANK1</i>     | rs516946   | 41638        | 8p  | A                 | 7.57E-07     | -                                       | ns                               | 41608                            | -                                  | <i>AGPAT6</i>                              | 1                                     | <i>ANK1</i>                                                                                              | 14                                  |
| 129    | <i>TLE4</i>     | rs13292136 | 81142        | 9q  | A                 | 2.97E-02     | -                                       | ns                               | 81146                            | -                                  | <i>CHCHD9</i>                              | 0                                     | -                                                                                                        | -                                   |
| 130    | <i>FAF1</i>     | rs17106184 | 50683        | 1p  | A                 | 5.38E-02     | -                                       | ns                               | 50894                            | -                                  | <b><i>FAF1</i></b>                         | 2                                     | <i>EPS15, TXNDC12*</i>                                                                                   | 4                                   |
| 131    | <i>BCAR1</i>    | rs7202877  | 73805        | 16q | A                 | 2.92E-03     | -                                       | ns                               | 73490                            | -                                  | <b><i>WDR59</i></b>                        | 1                                     | <i>FA2H</i>                                                                                              | 16                                  |
| 132    | <i>SRR</i>      | rs2447090  | 2246         | 17p | A                 | 2.28E-07     | -                                       | ns                               | 2039                             | -                                  | <b><i>SMG6</i></b>                         | 7                                     | <i>SRR, RPA1, CAMKK1, ZZEF1, TSRI, SMG6*, TMEM93</i>                                                     | 0                                   |
| 133    | <i>PEPD</i>     | rs8182584  | 38602        | 19q | A                 | 7.27E-03     | -                                       | ns                               | 38543                            | -                                  | <i>CEBPG</i>                               | 0                                     | -                                                                                                        | -                                   |
| 134    | <i>ADCY5</i>    | rs11717195 | 124565       | 3q  | WM                | 3.23E-23     | 7                                       | 124531                           | >100kb                           | 124538                             | <i>ADCY5</i>                               | 2                                     | <i>SEC22A, CCDC14*</i>                                                                                   | 15                                  |
| 135    | <i>POU5F1</i>   | rs3130501  | 31244        | 6p  | WM                | 3.21E-35     | 4                                       | 31773                            | >100kb                           | 31777                              | <i>LINC00243</i>                           | 13                                    | <i>LST1, LY6G6C, C6ORF25, MSH5, SLC44A4*, VARS2, DDRI, FLOT1, ABCF1, HLA-DQB2, TAP2*, TRIM15, TRIM40</i> | 0                                   |
| 136    | <i>DGKB</i>     | rs6960043  | 15019        | 7p  | WM                | 3.90E-47     | 2                                       | 15034                            | >100kb                           | 15032                              | <b><i>DGKB</i></b>                         | 0                                     | -                                                                                                        | -                                   |
| 137    | <i>TSPAN8</i>   | rs7955901  | 69720        | 12q | WM                | 4.01E-37     | 11                                      | 69867                            | >100kb                           | 69878                              | <i>TSPAN8</i>                              | 2                                     | <i>LRRC10, FRS2</i>                                                                                      | 0                                   |
| 138    | <i>MPHOSPH9</i> | rs4275659  | 122014       | 12q | WM                | 4.46E-05     | 61                                      | 121953                           | >100kb                           | 122014                             | <i>VPS37B, ABCB9<sup>+</sup></i>           | 9                                     | <i>DNAH10, PITPNM2, ABCB9, VPS37B, TMED2, RSR2, ZCCHC8, NCOR2, DIABLO</i>                                | 0                                   |
| 139    | <i>HMG20A</i>   | rs7177055  | 75620        | 15q | WM                | 2.25E-04     | 40                                      | 75058                            | >100kb                           | 75098                              | <i>PSTPIP1</i>                             | 2                                     | <i>HMG20A, TSPAN3</i>                                                                                    | 0                                   |
| 140    | <i>IRS1</i>     | rs7578326  | 226729       | 2q  | WM                | 3.08E-41     | 59                                      | 226788                           | ns                               | 226729                             | <b><i>LOC646736</i></b>                    | 0                                     | -                                                                                                        | -                                   |
| 141    | <i>PPARG</i>    | rs13081389 | 12265        | 3p  | WM                | 4.33E-17     | 18                                      | 12311                            | ns                               | 12292                              | <b><i>PPARG</i></b>                        | 1                                     | <i>WNT7A</i>                                                                                             | 6                                   |
| 142    | <i>ADAMTS9</i>  | rs6795735  | 64680        | 3p  | WM                | 1.01E-13     | 1                                       | 64707                            | ns                               | 64706                              | <b><i>ADAMTS9</i></b>                      | 0                                     | -                                                                                                        | -                                   |
| 143    | <i>IGF2BP2</i>  | rs4402960  | 186994       | 3q  | WM                | 1.89E-23     | 1                                       | 187031                           | ns                               | 187032                             | <b><i>IGF2BP2</i></b>                      | 0                                     | -                                                                                                        | -                                   |
| 144    | <i>ARL15</i>    | rs702634   | 53307        | 5q  | WM                | 2.85E-04     | 99                                      | 53347                            | ns                               | 53248                              | <b><i>ARL15</i></b>                        | 1                                     | <i>FST*</i>                                                                                              | 19                                  |
| 145    | <i>ZBED3</i>    | rs6878122  | 76463        | 5q  | WM                | 1.81E-11     | 0                                       | 76457                            | ns                               | 76457                              | <b><i>ZBED3</i></b>                        | 1                                     | <i>PDE8B*</i>                                                                                            | 16                                  |
| 146    | <i>JAZF1</i>    | rs849135   | 28163        | 7p  | WM                | 2.51E-67     | 90                                      | 28226                            | ns                               | 28136                              | <b><i>JAZF1</i></b>                        | 0                                     | -                                                                                                        | -                                   |
| 147    | <i>KLF14</i>    | rs13233731 | 130088       | 7q  | WM                | 2.59E-06     | 46                                      | 130074                           | ns                               | 130120                             | <b><i>KLF14</i></b>                        | 0                                     | -                                                                                                        | -                                   |

|     |                 |            |        |     |    |           |    |        |        |        |                          |   |                                                       |    |
|-----|-----------------|------------|--------|-----|----|-----------|----|--------|--------|--------|--------------------------|---|-------------------------------------------------------|----|
| 148 | <i>TP53INP1</i> | rs7845219  | 96007  | 8q  | WM | 1.28E-11  | 97 | 96132  | ns     | 96035  | <i>NDUFAF6, TP53INP1</i> | 6 | <i>GDF6, GEM, MTERFD1, FAM92A1, C8orf37, KIAA1429</i> | 0  |
| 149 | <i>HHEX/IDE</i> | rs1111875  | 94453  | 10q | WM | 2.27E-61  | 21 | 94490  | ns     | 94469  | <i>HHEX</i>              | 1 | <i>MARCH5</i>                                         | 1  |
| 150 | <i>HNFL1A</i>   | rs12427353 | 119911 | 12q | WM | 3.79E-31  | 74 | 119794 | ns     | 119720 | <i>SPPL3</i>             | 1 | <i>MSI1</i>                                           | 48 |
| 151 | <i>PRC1</i>     | rs8042680  | 89322  | 15q | WM | 3.68E-56  | 59 | 89245  | ns     | 89304  | <i>MAN2A2, RCCDI*</i>    | 4 | <i>RCCDI, UNC45A, IQGAPI*, FAM174B*</i>               | 1  |
| 152 | <i>FTO</i>      | rs9936385  | 52377  | 16q | WM | 2.52E-176 | 11 | 52368  | ns     | 52357  | <i>FTO</i>               | 0 | -                                                     | -  |
| 153 | <i>MC4R</i>     | rs12970134 | 56036  | 18q | WM | 5.19E-21  | 1  | 55879  | ns     | 55880  | <i>RPS3A</i>             | 0 | -                                                     | -  |
| 154 | <i>GCKR</i>     | rs780094   | 27595  | 2p  | M  | 2.16E-17  | -  | >100kb | >100kb | 27228  | <i>TCF23</i>             | 2 | <i>PLB1, KHK</i>                                      | 6  |
| 155 | <i>GCCI</i>     | rs17867832 | 126784 | 7q  | M  | 1.01E-02  | -  | >100kb | ns     | 126964 | <i>GCCI</i>              | 1 | <i>IMPDH1</i>                                         | 23 |
| 156 | <i>NOTCH2</i>   | rs10923931 | 120319 | 1p  | M  | 1.42E-24  | -  | ns     | ns     | 120238 | <i>ADAM30</i>            | 0 | -                                                     | -  |
| 157 | <i>PROX1</i>    | rs2075423  | 212221 | 1q  | M  | 1.71E-04  | -  | ns     | ns     | 212226 | <i>PROX1</i>             | 0 | -                                                     | -  |
| 158 | <i>THADA</i>    | rs10203174 | 43544  | 2p  | M  | 4.35E-15  | -  | ns     | ns     | 43555  | <i>THADA</i>             | 0 | -                                                     | -  |
| 159 | <i>GRB14</i>    | rs13389219 | 165237 | 2q  | M  | 7.31E-03  | -  | ns     | ns     | 165209 | <i>GRB14</i>             | 1 | <i>SCN2A</i>                                          | 32 |
| 160 | <i>WFS1</i>     | rs4458523  | 6341   | 4p  | M  | 2.61E-46  | -  | ns     | ns     | 6359   | <i>WFS1</i>              | 3 | <i>GRPEL1, STK32B, KIAA0232</i>                       | 2  |
| 161 | <i>SLC30A8</i>  | rs3802177  | 118254 | 8q  | M  | 6.10E-05  | -  | ns     | ns     | 118251 | <i>SLC30A8</i>           | 1 | <i>SAMD12</i>                                         | 0  |
| 162 | <i>GLIS3</i>    | rs10758593 | 4282   | 9p  | M  | 2.45E-10  | -  | ns     | ns     | 4273   | <i>GLIS3</i>             | 0 | -                                                     | -  |
| 163 | <i>CDC123</i>   | rs11257655 | 12348  | 10p | M  | 4.54E-06  | -  | ns     | ns     | 12189  | <i>DHTKD1</i>            | 0 | -                                                     | -  |
| 164 | <i>ARAP1</i>    | rs1552224  | 72111  | 11q | M  | 1.67E-03  | -  | ns     | ns     | 72534  | <i>FCHSD2</i>            | 1 | <i>POLD3</i>                                          | 8  |
| 165 | <i>CILP2</i>    | rs10401969 | 19269  | 19p | M  | 1.35E-39  | -  | ns     | ns     | 19188  | <i>NCAN</i>              | 3 | <i>ATP13A1, KIAA0892, TM6SF2*</i>                     | 2  |
| 166 | <i>GIPR</i>     | rs8108269  | 50850  | 19q | M  | 1.49E-04  | -  | ns     | ns     | 51124  | <i>NOVA2</i>             | 0 | -                                                     | -  |
| 167 | <i>RND3</i>     | rs7560163  | 151346 | 2q  | W  | 4.53E-02  | -  | 151248 | ns     | -      | <i>LOC101929282</i>      | 0 | -                                                     | -  |
| 168 | <i>SSR1</i>     | rs9505118  | 7235   | 6p  | W  | 4.31E-02  | -  | 7229   | >100kb | -      | <i>SSR1</i>              | 1 | <i>BMP6</i>                                           | 46 |
| 169 | <i>ZMIZ1</i>    | rs12571751 | 80613  | 10q | W  | 4.06E-04  | -  | 80700  | ns     | -      | <i>ZMIZ1</i>             | 1 | <i>DYDC2</i>                                          | 9  |
| 170 | <i>GRK5</i>     | rs10886471 | 121139 | 10q | W  | 3.28E-02  | -  | 121233 | ns     | -      | <i>RGS10</i>             | 0 | -                                                     | -  |
| 171 | <i>CCND2</i>    | rs11063069 | 4245   | 12p | W  | 1.04E-02  | -  | 4170   | ns     | -      | <i>CCND2</i>             | 0 | -                                                     | -  |
| 172 | <i>VPS26A</i>   | rs1802295  | 70601  | 10q | W  | 1.03E-02  | -  | 70421  | ns     | ns     | <i>KIAA1279</i>          | 1 | <i>HERC4</i>                                          | 49 |
| 173 | <i>C2CD4A</i>   | rs4502156  | 60170  | 15q | W  | 2.02E-02  | -  | 59905  | ns     | ns     | <i>VPS13C</i>            | 4 | <i>APH1B, RORA, VPS13C, TPM1</i>                      | 14 |
| 174 | <i>ABCC5</i>    | -          | -      | 3q  | WA | 1.00E-07  | 0  | 185136 | 185136 | -      | <i>ABCC5+</i>            | 1 | <i>ABCC5</i>                                          | 0  |

**Table S2. Demographic characteristics for targeted re-sequence T2D case/ control European samples.**

| <b>Cases</b>    | Variable | Obs | Mean | Std Dev. | Min  | Max  |
|-----------------|----------|-----|------|----------|------|------|
| Female          | Age      | 57  | 47.4 | 7.0      | 26.0 | 72.0 |
|                 | BMI      | 57  | 27.1 | 4.6      | 17.6 | 34.7 |
| Male            | Age      | 49  | 43.5 | 7.5      | 20.0 | 53.0 |
|                 | BMI      | 49  | 25.9 | 3.5      | 17.6 | 34.5 |
| <b>Controls</b> |          |     |      |          |      |      |
| Female          | Age      | 57  | 47.8 | 7.3      | 26.0 | 72.0 |
|                 | BMI      | 57  | 27.7 | 4.0      | 21.1 | 34.8 |
| Male            | Age      | 49  | 40.7 | 7.1      | 20.0 | 53.0 |
|                 | BMI      | 49  | 27.0 | 3.6      | 18.7 | 34.5 |

## References

1. Wellcome Trust Case Control Consortium (2007). Genome-wide association study of 14,000 cases of seven common diseases and 3,000 shared controls. *Nature* 447, 661-678.
2. Voight, B.F., Kang, H.M., Ding, J., Palmer, C.D., Sidore, C., Chines, P.S., Burt, N.P., Fuchsberger, C., Li, Y., Erdmann, J., et al. (2012). The metabochip, a custom genotyping array for genetic studies of metabolic, cardiovascular, and anthropometric traits. *PLoS Genet* 8, e1002793.
3. Voight, B.F., Scott, L.J., Steinthorsdottir, V., Morris, A.P., Dina, C., Welch, R.P., Zeggini, E., Huth, C., Aulchenko, Y.S., Thorleifsson, G., et al. (2010). Twelve type 2 diabetes susceptibility loci identified through large-scale association analysis. *Nat Genet* 42, 579-589.
4. Report of the Expert Committee on the Diagnosis and Classification of Diabetes Mellitus. *Diabetes Care* 20 (1997), 1183-1197.
5. Expert Committee on the, D., and Classification of Diabetes, M. (2003). Report of the expert committee on the diagnosis and classification of diabetes mellitus. *Diabetes Care* 26 Suppl 1, S5-20.
6. Definition, diagnosis and classification of diabetes mellitus, report of a WHO consultation, part 1: diagnosis and classification of diabetes mellitus (1999). In, W.H. Organization, ed. Geneva.
7. Palmer, N.D., McDonough, C.W., Hicks, P.J., Roh, B.H., Wing, M.R., An, S.S., Hester, J.M., Cooke, J.N., Bostrom, M.A., Rudock, M.E., et al. (2012). A genome-wide association search for type 2 diabetes genes in African Americans. *PLoS One* 7, e29202.
8. Wellcome Trust Case Control Consortium 2 (2008). In, W.T.S. Institute, ed. (Wellcome Trust Sanger Institute).
9. Martin, L.J., Comuzzie, A.G., Dupont, S., Vionnet, N., Dina, C., Gallina, S., Houari, M., Blangero, J., and Froguel, P. (2002). A quantitative trait locus influencing type 2 diabetes susceptibility maps to a region on 5q in an extended French family. *Diabetes* 51, 3568-3572.
10. Vionnet, N., Hani, E.H., Dupont, S., Gallina, S., Francke, S., Dotte, S., De Matos, F., Durand, E., Lepretre, F., Lecoeur, C., et al. (2000). Genomewide search for type 2 diabetes-susceptibility genes in French whites: evidence for a novel susceptibility locus for early-onset diabetes on chromosome 3q27-qter and independent replication of a type 2-diabetes locus on chromosome 1q21-q24. *Am J Hum Genet* 67, 1470-1480.
11. Hager, J., Dina, C., Francke, S., Dubois, S., Houari, M., Vatin, V., Vaillant, E., Lorentz, N., Basdevant, A., Clement, K., et al. (1998). A genome-wide scan for human obesity genes reveals a major susceptibility locus on chromosome 10. *Nat Genet* 20, 304-308.
12. Meyre, D., Lecoeur, C., Delplanque, J., Francke, S., Vatin, V., Durand, E., Weill, J., Dina, C., and Froguel, P. (2004). A genome-wide scan for childhood obesity-associated traits in French families shows significant linkage on chromosome 6q22.31-q23.2. *Diabetes* 53, 803-811.
13. Maniatis, N., Collins, A., Xu, C.F., McCarthy, L.C., Hewett, D.R., Tapper, W., Ennis, S., Ke, X., and Morton, N.E. (2002). The first linkage disequilibrium (LD) maps: delineation of hot and cold blocks by diplotype analysis. *Proc Natl Acad Sci U S A* 99, 2228-2233.
14. Maniatis, N. (2007). Linkage disequilibrium maps and disease-association mapping. *Methods Mol Biol* 376, 109-121.
15. Lau, W., Kuo, T.Y., Tapper, W., Cox, S., and Collins, A. (2007). Exploiting large scale computing to construct high resolution linkage disequilibrium maps of the human genome. *Bioinformatics* 23, 517-519.
16. Maniatis, N., Collins, A., Gibson, J., Zhang, W., Tapper, W., and Morton, N.E. (2004). Positional cloning by linkage disequilibrium. *Am J Hum Genet* 74, 846-855.
17. Grundberg, E., Small, K.S., Hedman, A.K., Nica, A.C., Buil, A., Keildson, S., Bell, J.T., Yang, T.P., Meduri, E., Barrett, A., et al. (2012). Mapping cis- and trans-regulatory effects across multiple tissues in twins. *Nat Genet* 44, 1084-1089.
18. Maniatis, N., Collins, A., and Morton, N.E. (2007). Effects of single SNPs, haplotypes, and whole-genome LD maps on accuracy of association mapping. *Genet Epidemiol* 31, 179-188.

19. Morton, N., Maniatis, N., Zhang, W., Ennis, S., and Collins, A. (2007). Genome scanning by composite likelihood. *Am J Hum Genet* 80, 19-28.
20. Mahajan, A., Go, M.J., Zhang, W., Below, J.E., et al.; DIABetes Genetics Replication And Meta-analysis (DIAGRAM) Consortium; Asian Genetic Epidemiology Network Type 2 Diabetes (AGEN-T2D) Consortium; South Asian Type 2 Diabetes (SAT2D) Consortium; Mexican American Type 2 Diabetes (MAT2D) Consortium; Type 2 Diabetes Genetic Exploration by Next-generation sequencing in multi-Ethnic Samples (T2D-GENES) Consortium (2014). Genome-wide trans-ancestry meta-analysis provides insight into the genetic architecture of type 2 diabetes susceptibility. *Nat Genet* 46, 234-244.
21. Morris, A.P. (2014). Fine mapping of type 2 diabetes susceptibility loci. *Curr Diab Rep* 14, 549.
22. Price, A.L., Spencer, C.C., and Donnelly, P. (2015). Progress and promise in understanding the genetic basis of common diseases. *Proceedings Biological sciences / The Royal Society* 282.
23. Greenawald, D.M., Dobrin, R., Chudin, E., Hatoum, I.J., Suver, C., Beaulaurier, J., Zhang, B., Castro, V., Zhu, J., Sieberts, S.K., et al. (2011). A survey of the genetics of stomach, liver, and adipose gene expression from a morbidly obese cohort. *Genome research* 21, 1008-1016.
24. Direk, K., Lau, W., Small, K.S., Maniatis, N., and Andrew, T. (2014). ABCC5 transporter is a novel type 2 diabetes susceptibility gene in European and African American populations. *Ann Hum Genet* 78, 333-344.
25. Chan, D.C. (2006). Mitochondria: dynamic organelles in disease, aging, and development. *Cell* 125, 1241-1252.
26. Claussnitzer, M., Hui, C.C., and Kellis, M. (2016). FTO Obesity Variant and Adipocyte Browning in Humans. *The New England journal of medicine* 374, 192-193.
